## Conserved DNA polymorphisms distinguish species in the eastern North American white oak syngameon: Insights from an 80-SNP oak DNA genotyping toolkit <sup>1</sup>

Andrew L. Hipp<sup>2,3,\*</sup>, Alan T. Whittemore<sup>4</sup>, Mira Garner<sup>2</sup>, Marlene Hahn<sup>2</sup>, Elisabeth Fitzek<sup>5</sup>, Erwan Guichoux<sup>6</sup>, Jeannine Cavender-Bares<sup>7</sup>, Paul F. Gugger<sup>8</sup>, Paul S. Manos<sup>9</sup>, Ian S. Pearse<sup>10</sup>, Charles H. Cannon<sup>2</sup>

<sup>1</sup> This paper is based on a talk presented by the first author at the Missouri Botanical Garden 65th Annual Fall Symposium. Portions of the introduction and conclusion are adapted from an essay published by the first author in the *Journal of International Oaks* (Hipp, 2015). Data and analyses presented here have not been published elsewhere. The majority of collections and all of M.G.'s time were funded by USDA Agreement Number 58-8020-5-005, project number 8020-21000-070-03S, to ALH and ATW. Leaf silhouettes were digitized in part by M. Kaproth. DNA barcoding data were generated with financial support of The Morton Arboretum's Center for Tree Science. Any use of trade, firm, or product names is for descriptive purposes only and does not imply endorsement by the U.S. Government.

<sup>2</sup> The Morton Arboretum, Herbarium, 4100 Illinois Route 53, Lisle, IL 60532, USA

<sup>3</sup> The Field Museum, Department of Botany, Chicago, IL 60605, USA

<sup>4</sup> U.S. National Arboretum, Washington, DC 20002, USA

<sup>5</sup> Universität Bielefeld, Department of Computational Biology, 33615 Bielefeld, GERMANY

<sup>6</sup> BIOGECO, INRA, Univ. Bordeaux, 33610 Cestas, France

<sup>7</sup> University of Minnesota, Minneapolis MN 55455, USA

<sup>8</sup> Maryland Center for Environmental Science, Appalachian Laboratory, Frostburg, MD 21532, USA

<sup>9</sup> Duke University, Durham NC 27708, USA

<sup>10</sup> U.S. Geological Survey, Fort Collins Science Center, Fort Collins, CO 80526, USA

\* Author for correspondence: [ahipp@mortonarb.org](mailto:ahipp@mortonarb.org)

## Abstract

The eastern North American white oaks, a complex of approximately 16 potentially interbreeding species, have become a classic model for studying the genetic nature of species in a syngameon. Genetic work over the past two decades has demonstrated the reality of oak species, but gene flow between sympatric oaks raises the question of whether there are conserved regions of the genome that define oak species. Does gene flow homogenize the entire genome? Do the regions of the genome that distinguish a species in one part of its range differ from the regions that distinguish it in other parts of its range, where it grows in sympatry with different species? Or are there regions of the genome that are relatively conserved across species ranges? In this study, we revisit seven species of the eastern North American white oak syngameon using a set of 80 SNPs selected in a previous study because they show differences among, and consistency within, the species. We test the hypothesis that there exist segments of the genome that do not become homogenized by repeated introgression, but retain distinct alleles characteristic for each species. We undertake a rangewide sampling to investigate whether SNPs that appeared to be fixed based on a relatively small sample in our previous work are fixed or nearly fixed across the range of the species. Each of the seven species remains genetically distinct across its range, given our diagnostic set of markers, with relatively few individuals exhibiting admixture of multiple species. This application of a DNA barcode designed for the simple problem of identifying species in the field has an important implication: the eastern North American white oak syngameon is composed of entities that most taxonomists would consider “good species,” and species in the syngameon retain their genetic cohesion because characteristic portions of the genome do not become homogenized despite a history of introgression.

**Keywords.** Cohesion species; DNA genotyping toolkit; hybridization; introgression; *Quercus alba*, *Quercus bicolor*, *Quercus macrocarpa*, *Quercus stellata*; single nucleotide polymorphism (SNP); syngameon

Hybridization in oaks has long been of interest to botanists. In the first edition of his *Manual of the Botany of the Northern United States*, Asa Gray (Gray & Sullivant, 1848) included two hybrids in the genus *Quercus*, both reported to be “founded on” a single tree or individual. In the 1857 through 1862 editions (Gray, 1857, 1859, 1862), this number increased to three, which Gray described as “the following remarkable forms, by some regarded as species.”<sup>1</sup> The 1867 edition (Gray, 1867) increased the number to five, and Wiegand (1935) notes that in this edition, “we find hybrids scarcely mentioned except in one genus, *Quercus*.” Of course, taxonomy at its best reflects speciation history. As a consequence, in the more than 140 years since the existence of interspecific hybrids was first well established, research has concentrated on the effects of interspecific hybridization on oak species origins, coherence and evolutionary trajectories (e.g., Engelmann, 1876; Palmer, 1948; Muller, 1952). As early as 1918 to 1933, studies of character segregation in first and second-generation oak hybrids suggested that adaptive gene flow might contribute to range extensions in the southern live oak *Quercus virginiana* (Ness, 1918; Allard, 1932; Yarnell & Palmer, 1933). Between the 1940s and the early 1960s, plant biologists such as Edgar Anderson (reviewed in Anderson, 1948; Anderson & Stebbins, 1954), G. Ledyard Stebbins (1950), and Verne Grant (1971) undertook quantitative research into hybridization and its role in plant speciation.

Building on this earlier work, a trio of now-classic papers from the mid 1970s, focused on the eastern North American white oak syngameon, set the stage for contemporary studies of oak species coherence. In 1975, James Hardin published an article in the *Journal of the Arnold Arboretum* reporting evidence of widespread gene flow among 16 white oaks of eastern North America (Hardin, 1975). At about the same time, a pair of articles in *Taxon* argued that gene flow in oaks is dominated by localized gene flow among individuals that are closely enough related to exchange genes, irrespective of species, rather than among populations within species (Burger, 1975; Van Valen, 1976). Because of ongoing gene flow and introgression, Burger and Van Valen argued, oak species cannot be defined by reproductive isolation. Rather, oak species represent ecologically discrete lineages with distinct evolutionary trajectories. “Species,” Van Valen wrote, “are maintained for the most part ecologically, not reproductively.” He and Burger both argued that local gene flow among sympatric populations of different species may exceed gene flow between geographically distant populations of single species, and that the capacity for interbreeding cannot therefore be the criterion by which we recognize oak species. Burger went so far as to suggest erecting subgenera or sections that are equivalent to reproductive species, but allowing our named species in oaks to represent ecologically and morphologically defined evolutionary lineages. The idea that gene flow is often insufficient to cause species to cohere across their range had been discussed previously (Ehrlich & Raven, 1969), but Burger and Van

---

<sup>1</sup> Perhaps not coincidentally, Gray’s language changes between 1848 and 1862—years flanking the publication of *Origin of Species*—from suggesting that these hybrids are mere sports to suggesting that they might be species of hybrid origin. Gray was a great supporter of Darwin and had an avid correspondence with him even before publication of *Origin* (Browne, 2010), and Gray’s change in language undoubtedly reflects a change in his view of the evolutionary implications of hybridization.

Valen seem to be making a stronger claim: oak species are delimited not reproductively, but ecologically. A measured skepticism about oak species is not uncommon among botanists even today, unsurprising in the face of ample evidence of introgression and gene flow (e.g., Whittmore & Schaal, 1991; Dumolin-Lapegue *et al.*, 1997; Dumolin-Lapegue, A., & Petit, 1999; Petit *et al.*, 2003; Dodd & Afzal-Rafii, 2004; Tovar-Sánchez & Oyama, 2004; Craft & Ashley, 2006; Lexer, Kremer, & Petit, 2006; Curtu, Gailing, & Finkeldey, 2007; Hipp & Weber, 2008; Chybicki & Burczyk, 2010; Moran, Willis, & Clark, 2012).

In this paper, we genotype a rangewide sample of seven eastern North American white oaks using a set of 80 SNPs designed to distinguish species in this classic syngameon. We ask whether the species are genetically cohesive at a small number of loci representing areas of the genome that have been shielded from introgression across the range of the species, in spite of numerous publications demonstrating gene flow among them. While investigating whether there exist loci that distinguish species in the white oak syngameon across their ranges, our study leaves open the question of *which* regions of the genome are responsible for species cohesion in oaks. This latter question will be a central question—perhaps the central question—of tree biodiversity for the coming decade, especially as increasing evidence suggests that forest tree syngameons may be common, especially in the tropics (Caron *et al.*; Cannon & Lerda, 2015; Kenzo *et al.*, 2019).

### ***Sampling and genotyping***

Data were initially collected from 184 individuals of seven eastern North American white oak species, collected from a wide geographic range for each species; in this study, *Quercus muehlenbergii* Engelm. and *Q. prinoides* Willd. are separated in name only, as our RAD-seq data failed to distinguish the species (McVay, Hipp, & Manos, 2017b; Hipp *et al.*, 2018) and SNPs were consequently not designed to separate these two (Fitzek *et al.*, 2018). The species status of these two bears investigation with broader sampling. Throughout the remainder of this paper, we will refer to these two together as *Q. muehlenbergii* / *prinoides*, not because we are making a claim that they are not distinct taxonomically, but to reflect the fact that they are grouped for analysis. Samples represent unique adults with seven exceptions, for which a second extraction of each individual was genotyped as a technical replicate. Individuals were selected to be typical of the species morphologically, not to be a random sample of all potential pure and introgressed individuals. Twenty-one individuals for which fewer than 90% of loci amplified successfully were removed from analysis and are not discussed further in this paper, leaving a final set of 163 individuals analyzed (Fig. 1; Table 1).

To reduce the opportunity for hybridization with taxa from outside the natural range of each species, samples were preferentially selected from wild populations or from trees grown in gardens from seeds of known wild provenance (as discussed in Fitzek *et al.*, 2018; Hipp *et al.*, 2018); five individuals were analyzed from cultivated material (Table 1). Sample size per species ranges from 7–9 in *Quercus montana* Willd. and *Q. michauxii* Nutt. to 38–52 in *Q.*

*muehlenbergii* / *prinoides* and *Q. macrocarpa* respectively (Table 1). The distance between the most widely separated populations sampled within each species ranges from 771 km in *Q. montana* to 3005 km in *Q. macrocarpa* (Table 2). Moreover, aside from samples of *Quercus macrocarpa* at the westernmost and northernmost edges of its range (Fig. 1), almost all samples in our study were collected from within the range of at least one other species. Consequently, while our study does not encompass the entire range of each species, the samples cover a wide geographic range within each species, with the opportunity for crossing among congeners. Locations for source populations of all samples for which source information was available were plotted over range maps for *Q. macrocarpa*, the most wide-ranging species in our study; *Q. bicolor*, the most widespread northern species; and *Q. stellata*, the most widespread southern species. Range maps were plotted from shapefiles (Prasad & Iverson, 2003) generated from previously published range maps of North American trees (Little, 1971, 1977, 1979) over the ‘county’ and ‘state’ base maps provided in maps v. 3.3.0 (Becker *et al.*, 2018) for R v. 3.4.2, ‘Short Summer’ (R-Development-Core-Team, 2004). All plotting was done in R using the ggplot2 (Wickham, 2009) and ggmap (Kahle & Wickham, 2013) packages, using proj4 (Urbanek, 2012) for map projections.

Samples were genotyped using an 80-SNP DNA barcoding toolkit developed to distinguish 15 eastern North American white oaks (as described in Fitzek *et al.*, 2018). Briefly, an extensive RAD-seq dataset comprising multiple exemplars of all 15 species (McVay *et al.*, 2017b) was surveyed for SNP variation, using pairwise  $F_{ST}$  to identify SNPs that were (1) fixed or nearly fixed between species and (2) flanked by at least 20 bp of conserved sequence, which could be used for primer design. Multiplexes of up to 40 primers for potential SNPs were designed using the Assay Design 4.0 Suite (Agena Biosciences, San Diego), which is optimized for MassARRAY analysis (Bradić, Costa, & Chelo, 2012). Samples were genotyped using the iPLEX Gold chemistry following Gabriel *et al.* (2009) on a MassARRAY system (Agena Biosciences) at the Genomic Platform of Bordeaux with the help of Adline Delcamp. Data analysis was completed using MassARRAY Typer Analyzer 4.0.26.75 (Agena Biosciences). We manually checked each marker clustering to detect potential ambiguous genotype assignment or unusable SNP. The results were exported as a genotype table for downstream analyses. After genotyping, 5 SNPs were removed from analysis because they failed to amplify in more than 30% of individuals.

### ***Data analysis: evaluating species cohesion***

We define species cohesion operationally in this study using two criteria: (1) clustering of all plants sampled from each species in genetic space, exclusive of other species, and irrespective of geography; and (2) minimal evidence of genetic admixture between species at some conserved region of the genome (in this case, based on preselected markers). By this definition, clustering of individuals by geography instead of by species would be evidence against species cohesion, as

would any proportion of the genome of individuals of a putative species that is shared with individuals of other putative species. This operational definition corresponds with practices widely used by plant systematists to define “good species” (Rieseberg, Wood, & Baack, 2006) as well as statistical methods traditionally used to infer patterns and degree of interspecific introgression (Anderson, 1949). It puts off for the time being possible empirical and philosophical issues with cohesion species as a concept (Barker, 2007; Barker & Wilson, 2010) as well as questions about the mechanisms by which species cohere (Morjan & Rieseberg, 2004).

We assess criterion 1, clustering in genetic space, using the unweighted pair group method with arithmetic mean (UPGMA) (Sokal & Michener, 1958), a clustering method that aggregates individuals based on a pairwise distance matrix, in this case a Euclidean distance matrix based on allele counts within individuals, where each allele is present as 0, 1, or 2 copies per individual. UPGMA is well suited to within-species comparisons of genetic data or other comparisons of data that are truly ultrametric, where it performs reasonably well as an estimator of genetic relatedness (Felsenstein, 2004). In our study, UPGMA has the desirable property of apportioning genetic variance to branches, so that we can assess whether the variance in our data is better assigned to among-species or within-species differences. Because our markers are designed with extreme bias toward among-species differences, we do not attempt to quantify variance components using AMOVA (Excoffier, Smouse, & Quattro, 1992) and urge that the clustering results not be interpreted as estimating these variance components. We compare UPGMA results with non-metric multidimensional scaling (NMDS) ordination on the same data matrix. We present results from the three-dimensional ordination because it suffices to discriminate the species in our study.

Criterion 2 we assess using the Bayesian population genetic clustering algorithm implemented in STRUCTURE v 2.3.4 (Pritchard, Stephens, & Donnelly, 2000). We utilized the admixture model with correlated allele frequencies and  $\lambda$  fixed at 1.0, allowing  $K$  (the number of populations) to range from 1 to 12. For each value of  $K$ , we ran 10 replicate MCMC runs of 1E06 generations following a 1E05 generation burn-in. We followed the method of Evanno et al. (2005) to identify the most probable value of  $K$  based on the maximum value of  $\Delta K$ , but given the problematic nature of identifying  $K$  with hierarchical data, we report the structures recovered under multiple values of  $K$ . We utilized STRUCTURE HARVESTER (<http://taylor0.biology.ucla.edu/structureHarvester/>) (Earl & vonHoldt, 2012) to calculate the Evanno statistics and CLUMPP v 1.1.2 for 64 bit Linux (Jakobsson & Rosenberg, 2007) to average STRUCTURE run replicates for each value of  $K$ . We visualized results using DISTRUCT v. 1.1 (Rosenberg, 2004).

To evaluate whether the entire barcode is necessary to discriminate among the species we are studying and to identify SNPs that might be fixed within species, we calculated the absolute number and proportion of individuals within each species possessing each polymorphism observed. With the caveat that sampling is uneven across species (ranging from  $N = 7$  in *Q. montana* to  $N = 52$  in *Q. macrocarpa*), the resulting heatmap (Fig. 2) and the table underlying it



(Supplement) estimate the decisiveness of each SNP relative to species identification in this species group: the summed proportion of individuals by species that have a given SNP estimates that SNP's decisiveness, where a sum of 1.0 or 2.0 (for *Q. muehlenbergii* / *prinoides*) indicates a locus that is alone decisive for a taxon for the samples we have genotyped. The reduced set may have practical benefit for both cost and because the combinability of primer pairs plays a crucial role in multiplexing (Fitzek *et al.*, 2018).

### **Data and code**

All data and code required to reproduce analyses presented here are archived in <https://github.com/andrew-hipp/white-oak-syngameon>.

### **Results**

In the full dataset of 184 individuals for 80 loci, missing data per individual averaged  $2.56\% \pm 4.10$  (s.d.) loci, and missing data per locus averaged  $14.6\% \pm 26.8$  (s.d.) individuals. In the dataset cleaned down to 163 individuals for 75 loci, excluding individuals with  $>10\%$  missing loci and loci with  $>30\%$  missing individuals, missing data dropped to  $1.19 \pm 1.13\%$  missing loci per individual and  $5.60 \pm 13.9\%$  missing individuals per locus. Of the 75 cleaned loci, 20 were monomorphic and 55 had two or more polymorphisms. Among 7 pairs of technical replicates, a total of 38 differences were found. Of these, 37 were differences in whether a locus amplified or not; only one difference in allele call was found (for locus CL\_55087\_OAKMOR340\_32, G/T in *Quercus stellata* QUE002706 vs. G/G in specimen QUE000137). Thus among  $7 \times 75 = 525$  replicated sites, only one genotyping error (0.17%) and 37 loci that failed to amplify in one of the two replicates (6.43%) were detected.

Seven loci exhibit only a single SNP for exactly one species in our dataset—one in *Q. alba*, two in *Q. michauxii*, four in *Q. montana*—and three exhibit a single SNP in *Q. muehlenbergii* / *prinoides*. An additional ten SNPs exhibit a summed proportion between 0.95 and 1.05, suggesting relatively high decisiveness for *Q. stellata* (2 SNPs) and *Q. bicolor* (3 SNPs). Based on these, we hand-picked 20 SNPs that suffice to diagnose the species in our study (Fig. 2, red bars along left edge).

Using all loci, the UPGMA (Fig. 3a) and NMDS ordination (Fig. 4) both clearly separate individuals by species, except for *Quercus prinoides* and *Q. muehlenbergii*, which our barcoding primers were not designed to distinguish from one another. Thus there are seven distinct clusters recognized in this study. Individuals of these clusters separate with no overlap in three dimensional genetic ordination space (Fig. 4; note that while some species overlap in one or two dimensions, none overlap in all three) and UPGMA stem lengths that equal or exceed the species crown depth for four of the clusters (*Q. macrocarpa*, *Q. bicolor*, *Q. muehlenbergii* / *prinoides*, and *Q. montana*) and, for the other three, stem lengths that are approximately equal to (*Q. stellata*, *Q. michauxii*) or substantially less than (*Q. alba*) the crown height. Using the 20 hand-

picked loci, our barcode successfully distinguishes species from one another using UPGMA (Fig. 3b).

Bayesian admixture analysis in STRUCTURE favors a  $K = 4$  solution using the  $\Delta K$  statistic of Evanno et al. (2005). Given the susceptibility of STRUCTURE and particularly the  $\Delta K$  statistic to the highest hierarchical level of genetic structure in a dataset, we find the  $K = 4$  solution not a useful description of genetic structure in our phylogenetically structured dataset. To the contrary, the  $K = 4$  clustering does the best job at separating species by clade, following well supported phylogenetic relationships (Hipp *et al.*, 2018), viz. four clusters comprising *Quercus macrocarpa* and *Q. bicolor*; *Q. alba*, *Q. michauxii*, and *Q. montana*; and *Q. stellata* and *Q. muehlenbergii / prinoides* each on their own (Fig. 5). Given our phylogenetically structured sample, it is not surprising that  $\Delta K$  favors a configuration that splits individuals among clades above the species level. STRUCTURE continues to distinguish species up until  $K = 8$ , with 7 species pairs yielding individuals admixed 10% or more based on our markers (Figs. 5, 6). Notably, it is not until  $K = 8$  that the 7 species are distinguished from each other, perhaps due to high genetic variation within species that is not adequately resolved with these markers. One individual identified as *Q. alba* in the field shows evidence of introgression from both *Q. macrocarpa* and *Q. bicolor*. In the  $K = 8$  configuration, *Q. bicolor* gives the appearance of being uniformly admixed with *Q. montana* at a relatively low level (9/10 individuals < 10% admixed). However, this appears to be artefactual, as the phenomenon is absent in the  $K = 6, 7$ , and 9 configurations, all of which show genetic separation between *Q. bicolor* and *Q. montana*. In the  $K = 8$  configuration, *Q. alba* resolves as a mix of two genotypes, which we combine in estimating the number of individuals admixed at 5, 10, 15, or 20% (Supplemental Tables; Fig. 6).

## Discussion

Our study demonstrates that with a relatively small amount of curated data—just 20 SNPs chosen to maximize genetic distinctiveness—we are able to distinguish seven genetically cohesive taxa. The fact that we are able to identify fixed or nearly-fixed SNPs across wide geographic ranges in several species suggests that introgression is distributed heterogeneously along the genome, with some areas of the genome strongly protected against introgression on a species-pair by species-pair basis. Given that these apparently-fixed SNPs are limited to our species with smallest sample size—one in *Q. alba* ( $N = 10$ ), two in *Q. michauxii* ( $N = 9$ ), four in *Q. montana* ( $N = 7$ )—the question of whether they are truly fixed bears further investigation. However, *Q. muehlenbergii / prinoides* is represented by 38 individuals in our dataset and three fixed SNPs, suggesting that the high-frequency proportional representation of SNPs in some species may not be an artifact of low sample size. We interpret this finding as evidence that these seven species are genetically cohesive across their ranges at least at a small number of regions of the genome, even in the face of introgression.

It is somewhat remarkable that we are able to distinguish seven interbreeding oak species with just 20 hand-picked markers. By comparison, the now-classic study demonstrating genetic



distinctiveness of *Q. petraea* (Matt.) Liebl. and *Q. robur* L. utilized 20 microsatellites for just those two species (Muir, Fleming, & Schlotterer, 2000). Other studies using five (Craft & Ashley, 2006), six (Moran *et al.*, 2012), or even fifteen variable microsatellites (Aldrich *et al.*, 2003) have by contrast failed to find consistent genetic differentiation between two to three co-occurring white or red oaks (for a counter-example of relatively clean differentiation based on only 11 microsatellites, see Cavender-Bares & Pahlich, 2009). All used markers selected for variability rather than for segregation by species. Larger numbers of loci (as low as 27--28 in, e.g., Owusu *et al.*, 2015; Sullivan *et al.*, 2016) tend to pick up divergent neutral markers or markers under divergent selection (Lind-Riehl, Sullivan, & Gailing, 2014b; Sullivan *et al.*, 2016). This suggests that a moderate-sized but random sample of loci will often reflect regions of the genome that are either not yet differentiated between species (Muir & Schlotterer, 2005, 2006) or subject to ancient or contemporary gene flow (Lexer *et al.*, 2006). Because the loci that bear the stamp of population divergence history for one species pair may record introgression history for other species pairs (Hipp *et al.*, 2019), we would not expect any particular small set of loci to adequately describe species description across the oak phylogeny. In the current study, however, we have demonstrated that a small number *can* suffice to distinguish numerous species in a multispecies syngameon.

The SNPs we have utilized are few and may be linked to loci under strong selection; thus they may not be representative of the genome as a whole. As discussed in the paper in which these SNPs were published (Fitzek *et al.*, 2018), we selected SNPs by querying a RAD-seq dataset for loci that had pairwise  $F_{ST} > 0.95$ . Such outlier loci can tell much more refined stories about population divergence than loci that are not under such strong selection (Guichoux *et al.*, 2013) and may thus pick up on divergence histories that are not clear from a broader sample of loci. These selected genes may occur in islands of differentiation distributed across the genome (Scotti-Saintagne *et al.*, 2004) and have the potential to explain genetic cohesion across species ranges even when populations diverge at neutral loci (Morjan & Rieseberg, 2004) or to differentiate species that are exchanging genes more frequently across the remainder of the genome (Lind-Riehl, Sullivan, & Gailing, 2014a; Gailing & Curtu, 2014; Oney-Birol *et al.*, 2018; Hipp, 2018). This gives them practical utility as a DNA barcode. A genome-scale investigation, as has been conducted in the European white oaks (Leroy *et al.*, 2017, 2018), would be required to characterize the genomic architecture of differentiation among these species and address the question of whether species differences are concentrated in divergent loci under strong selection. For the time being, our study suggests that a relatively small number of selected genes may suffice to *diagnose*—not *define*—species, even in the face of ongoing introgression.

We expect our power to detect complex patterns of introgression in a multispecies hybrid zone to be compromised by the low locus-sampling of this barcode (only 20 selected SNPs). Nonetheless, our study demonstrates that even without attempting to find hybrids, potentially biasing ourselves against detecting introgression, and even without employing the large numbers of loci generally favored for hybridization studies, we can identify introgressants involving

several pairs of species from a sampling of natural populations (Figs. 5, 6). The fact that we have selected loci to be fixed or nearly fixed within species may aid in detecting first generation hybrids. At the same time, by selecting genes with high pairwise  $F_{ST}$ , we effectively designed our SNPs within outlier loci, which may overestimate divergence between species and underestimate the proportion of the genome that is subject to introgression. The pairs that we found to be admixed at the 10% level for at least one individual were also found by Hardin to hybridize (Fig. 6; cf. Fig 1. in Hardin 1975). It remains to be seen using genomic markers that are not subject to the ascertainment bias in our study what the actual frequency and average percent of admixture is for these species.

### **Conclusions**

Oaks have been a bugbear of systematics since Darwin's time, raising significant questions about what species are and how we can make sense of speciation in the face of ongoing gene flow (Arnold, 2016). Our work builds on studies that, in aggregate, suggest that oak species are genetically coherent across their ranges (Muir *et al.*, 2000; Hipp & Weber, 2008; Cavender-Bares & Pahlich, 2009; Hauser *et al.*, 2017) despite a history of introgression (Eaton *et al.*, 2015; McVay *et al.*, 2017a; Kim *et al.*, 2018). We concur with Hardin (1975), who wrote, "Neither Baranski (1975) nor I agree with Minckler (1965), who thinks that hybridization may mask evidence of races within white oak."

Our study does not, however, speak to the real frequency of hybridization, because our markers are selected for fixation or near-fixation within species. This bias may afford the markers increased utility to identify early-generation hybrids, but make them poor estimators of genome-wide rates of genetic exchange. It's important to note, in fact, that we could have told the story of introgression with a different hand-picked set of 20 or 80 SNPs: the "right" regions of the genome—by which we mean those regions that favor one particular gene-flow / genetic coherence process over another—will tell one story or the other. Both stories are embedded in the genome, and both are equally real. We cannot consequently assess Muller's (1952) claim that "the bulk of claims of hybridity [in *Quercus*] are based upon trivial variations of the sort one may encounter in a relatively pure population of a single species." What we can say is that the eastern North American white oak syngameon is composed of entities that most taxonomists would consider "good species."

### **Literature cited**

Aldrich PR, Parker GR, Michler CH & Romero-Severson J. 2003. Whole-tree silvic identifications and the microsatellite genetic structure of a red oak species complex in an Indiana old-growth forest. *Canadian Journal of Forest Research* 33: 2228–2237.

Allard HA. 1932. A progeny study of the so-called oak species *Quercus saulii*, with notes on other probable hybrids found in or near the District of Columbia. *Bulletin of the Torrey Botanical Club* 59: 267–277.

Anderson E. 1948. Hybridization of the habitat. *Evolution* 2: 1–9.

Anderson E. 1949. *Introgressive hybridization*. New York: John Wiley & Sons, Inc.

Anderson E & Stebbins GL. 1954. Hybridization as an Evolutionary Stimulus. *Evolution* 8: 378–388.

Arnold ML. 2016. *Divergence With Genetic Exchange*. Oxford: Oxford University Press.

Baranski MJ. 1975. *An analysis of variation within white oak (Quercus alba L.)*. Raleigh: North Carolina Agricultural Experiment Station.

Barker MJ. 2007. The Empirical Inadequacy of Species Cohesion by Gene Flow. *Philosophy of Science* 74: 654–665.

Barker MJ & Wilson RA. 2010. Cohesion, Gene Flow, and the Nature of Species. *The Journal of Philosophy* 107: 61–79.

Becker RA, Wilks AR, Brownrigg R, Minka TP & Deckmyn A. 2018. *maps: Draw Geographical Maps*.

Bradić M, Costa J & Chelo IM. 2012. Genotyping with Sequenom. In: *Molecular Methods for Evolutionary Genetics*. Humana Press, 193–210.

Browne J. 2010. Asa Gray and Charles Darwin: Corresponding Naturalists. *Harvard Papers in Botany* 15: 209–220.

Burger WC. 1975. The species concept in *Quercus*. *Taxon* 24: 45–50.

Cannon CH & Ler dau M. 2015. Variable mating behaviors and the maintenance of tropical biodiversity. *Frontiers in Genetics* 6.

Caron H, Molino JF, Sabatier D, Léger P, Chaumeil P, Scotti Saintagne C, Frigério JM, Scotti I, Franc A & Petit RJ. Chloroplast DNA variation in a hyperdiverse tropical tree community. *Ecology and Evolution* 0.

Cavender-Bares J & Pahlich A. 2009. Molecular, morphological, and ecological niche differentiation of sympatric sister oak species, *Quercus virginiana* and *Q. geminata* (Fagaceae). *American Journal of Botany* 96: 1690–1702.

Chybicki IJ & Burczyk J. 2010. Realized gene flow within mixed stands of *Quercus robur* L. and *Q. petraea* (Matt.) L. revealed at the stage of naturally established seedling. *Molecular Ecology* 19: 2137–2151.

- Craft KJ & Ashley MV. 2006. Population differentiation among three species of white oak in northeastern Illinois. *Canadian Journal of Forest Research* 26: 206–215.
- Curtu A, Gailing O & Finkeldey R. 2007. Evidence for hybridization and introgression within a species-rich oak (*Quercus* spp.) community. *BMC Evolutionary Biology* 7: 218.
- Dodd RS & Afzal-Rafii Z. 2004. Selection and dispersal in a multispecies oak hybrid zone. *Evolution* 58: 261–269.
- Dumolin-Lapegue S, Demesure B., Fineschi S, Come V. L & Petit RJ. 1997. Phylogeographic structure of white oaks throughout the European continent. *Genetics* 146: 1475–1487.
- Dumolin-Lapegue S, A. K & Petit RJ. 1999. Are Chloroplast and Mitochondrial DNA Variation Species Independent in Oaks? *Evolution* 53: 1406–1413.
- Earl DA & vonHoldt BM. 2012. STRUCTURE HARVESTER: a website and program for visualizing STRUCTURE output and implementing the Evanno method. *Conservation Genetics Resources* 4: 359–361.
- Eaton DAR, Hipp AL, González-Rodríguez A & Cavender-Bares J. 2015. Historical introgression among the American live oaks and the comparative nature of tests for introgression. *Evolution* 69: 2587–2601.
- Ehrlich PR & Raven PH. 1969. Differentiation of populations: Gene flow seems to be less important in speciation than the neo-Darwinians thought. *Science* 165: 1228–1232.
- Engelmann G. 1876. The oaks of the United States. *Transactions of the Academy of Sciences St. Louis* 3: 539–543.
- Evanno G, Regnaut S & Goudet J. 2005. Detecting the number of clusters of individuals using the software structure: a simulation study. *Molecular Ecology* 14: 2611–2620.
- Excoffier L, Smouse PE & Quattro JM. 1992. Analysis of molecular variance inferred from metric distances among DNA haplotypes: Application to human mitochondrial DNA restriction data. *Genetics* 131: 479–491.
- Felsenstein J. 2004. *Inferring Phylogenies*. Sunderland, Maryland: Sinauer Associates, Inc.
- Fitzek E, Delcamp A, Guichoux E, Hahn M, Lobdell M & Hipp AL. 2018. A nuclear DNA barcode for eastern North American oaks and application to a study of hybridization in an Arboretum setting. *Ecology and Evolution* 8: 5837–5851.
- Gabriel S, Ziaugra L & Tabbaa D. 2009. SNP Genotyping Using the Sequenom MassARRAY iPLEX Platform. *Current Protocols in Human Genetics* 60: 2.12.1-2.12.18.
- Gailing O & Curtu AL. 2014. Interspecific gene flow and maintenance of species integrity in oaks. *Annals of Forest Research* 57: 5-18–18.

Grant V. 1971. *Plant Speciation*. New York: Columbia University Press.

Gray A. 1857. *Manual of the botany of the northern United States. Including Virginia, Kentucky, and all east of the Mississippi: arranged according to the natural system*. New York: G. P. Putnam & Co.

Gray A. 1859. *Manual of the botany of the northern United States: including Virginia, Kentucky, and all east of the Mississippi arranged according to the natural system*. New York: Ivison & Phinney.

Gray A. 1862. *Manual of the botany of the northern United States, third revised edition*. Chicago: Ivison, Phinney, & Co.

Gray A. 1867. *Manual of the Botany of the Northern United States, Including the District East of the Mississippi and North of North Carolina and Tennessee, Arranged According to the Natural System*. New York: Ivison, Blakeman, Taylor & Co.

Gray A & Sullivant WS. 1848. *A manual of the botany of the northern United States, from New England to Wisconsin and south to Ohio and Pennsylvania inclusive (the mosses and liverworts by Wm. S. Sullivant) arranged according to the natural system*. Boston and London: J. Munroe, J. Chapman.

Guichoux E, Garnier-Géré P, Lagache L, Lang T, Boury C & Petit RJ. 2013. Outlier loci highlight the direction of introgression in oaks. *Molecular Ecology* 22: 450–462.

Hardin JW. 1975. Hybridization and introgression in *Quercus alba*. *Journal of the Arnold Arboretum* 56: 336–363.

Hauser DA, Keuter A, McVay JD, Hipp AL & Manos PS. 2017. The evolution and diversification of the red oaks of the California Floristic Province (*Quercus* section *Lobatae*, series *Agrifoliae*). *American Journal of Botany* 104: 1581–1595.

Hipp AL. 2015. Should hybridization make us skeptical of the oak phylogeny? *International Oak Journal* 26: 9–18.

Hipp AL, Manos PS, González-Rodríguez A, Hahn M, Kaproth M, McVay JD, Avalos SV & Cavender-Bares J. 2018. Sympatric parallel diversification of major oak clades in the Americas and the origins of Mexican species diversity. *New Phytologist* 217: 439–452.

Hipp AL. 2018. Pharaoh's Dance: the oak genomic mosaic. *PeerJ Preprints* 6: e27405v1.

Hipp AL, Manos PS, Hahn M, Avishai M, Bodénès C, Cavender-Bares J, Crawl A, Deng M, Denk T, Fitz-Gibbon S, Gailing O, González-Elizondo MS, González-Rodríguez A, Grimm GW, Jiang XL, Kremer A, Lesur I, McVay JD, Plomion C, Rodríguez-Correa H, Schulze ED, Simeone MC, Sork VL & Valencia-Avalos S. 2019. Genomic landscape of the global oak phylogeny. *bioRxiv*: 587253.

- Hipp AL & Weber JA. 2008. Taxonomy of Hill's Oak (*Quercus ellipsoidalis*: Fagaceae): Evidence from AFLP Data. *Systematic Botany* 33: 148–158.
- Jakobsson M & Rosenberg NA. 2007. CLUMPP: a cluster matching and permutation program for dealing with label switching and multimodality in analysis of population structure. *Bioinformatics* 23: 1801–1806.
- Kahle D & Wickham H. 2013. ggmap: Spatial Visualization with ggplot2. *The R Journal* 5: 144–161.
- Kenzo T, Kamiya K, Ngo KM, Faizu N, Lum SKY, Igarashi S, Norichika Y & Ichie T. 2019. Overlapping flowering periods among Shorea species and high growth performance of hybrid seedlings promote hybridization and introgression in a tropical rainforest of Singapore. *Forest Ecology and Management* 435: 38–44.
- Kim BY, Wei X, FitzGibbon S, Lohmueller KE, Ortego J, Gugger PF & Sork VL. 2018. RADseq data reveal ancient, but not pervasive, introgression between Californian tree and scrub oak species (*Quercus* sect. *Quercus*: Fagaceae). *Molecular Ecology* 27: 4556–4571.
- Leroy T, Roux C, Villate L, Bodénès C, Romiguier J, Paiva JAP, Dossat C, Aury JM, Plomion C & Kremer A. 2017. Extensive recent secondary contacts between four European white oak species. *New Phytologist* 214: 865–878.
- Leroy T, Rougemont Q, Dupouey JL, Bodenes C, Lalanne C, Belser C, Labadie K, Provost GL, Aury JM, Kremer A & Plomion C. 2018. Massive postglacial gene flow between European white oaks uncovered genes underlying species barriers. *bioRxiv*: 246637.
- Lexer C, Kremer A & Petit RJ. 2006. Shared alleles in sympatric oaks: recurrent gene flow is a more parsimonious explanation than ancestral polymorphism. *Molecular Ecology* 15: 2007–2012.
- Lind-Riehl JF, Sullivan AR & Gailing O. 2014a. Evidence for selection on a CONSTANS-like gene between two red oak species. *Annals of Botany*.
- Lind-Riehl JF, Sullivan AR & Gailing O. 2014b. Evidence for selection on a CONSTANS-like gene between two red oak species. *Annals of Botany* 113: 967–975.
- Little EL. 1971. *Atlas of United States trees, volume 1, Conifers and important hardwoods*. Washington, D.C.: U.S. Dept. of Agriculture, Forest Service.
- Little EL. 1977. *Atlas of United States trees, volume 4, Minor eastern hardwoods*. Washington, D.C.: U.S. Dept. of Agriculture, Forest Service.
- Little EL. 1979. *Checklist of United States trees (native and naturalized)*. Washington, D.C.: U.S. Department of Agriculture.
- McVay JD, Hauser D, Hipp AL & Manos PS. 2017a. Phylogenomics reveals a complex evolutionary history of lobed-leaf white oaks in western North America. *Genome* 60: 733–742.



- McVay JD, Hipp AL & Manos PS. 2017b. A genetic legacy of introgression confounds phylogeny and biogeography in oaks. *Proc. R. Soc. B* 284: 20170300.
- Minckler LS. 1965. White oak (*Quercus alba* L.). *Silvics of forest trees of the United States* 271: 631–637.
- Moran EV, Willis J & Clark JS. 2012. Genetic evidence for hybridization in red oaks (*Quercus* sect. *Lobatae*, Fagaceae). *American Journal of Botany* 99: 92–100.
- Morjan CL & Rieseberg LH. 2004. How species evolve collectively: implications of gene flow and selection for the spread of advantageous alleles. *Molecular Ecology* 13: 1341–1356.
- Muir G, Fleming CC & Schlötterer C. 2000. Species status of hybridizing oaks. *Nature (London)* 405: 1016.
- Muir G & Schlötterer C. 2005. Evidence for shared ancestral polymorphism rather than recurrent gene flow at microsatellite loci differentiating two hybridizing oaks (*Quercus* spp.). *Molecular Ecology* 14: 549–561.
- Muir G & Schlötterer C. 2006. Moving beyond single-locus studies to characterize hybridization between oaks (*Quercus* spp.). *Molecular Ecology* 15: 2301–2304.
- Muller CH. 1952. Ecological control of hybridization in *Quercus*: a factor in the mechanism of evolution. *Evolution* 6: 147–161.
- Ness H. 1918. Hybrids of the live oak and overcup oak. *Journal of Heredity* 9: 263–268.
- Oney-Birol S, Fitz-Gibbon S, Chen JM, Gugger PF & Sork VL. 2018. Assessment of shared alleles in drought-associated candidate genes among southern California white oak species (*Quercus* sect. *Quercus*). *BMC Genetics* 19: 88.
- Owusu SA, Sullivan AR, Weber JA, Hipp AL & Gailing O. 2015. Taxonomic Relationships and Gene Flow in Four North American *Quercus* Species (*Quercus* section *Lobatae*). *Systematic Botany* 40: 510–521.
- Palmer EJ. 1948. Hybrid oaks of North America. *Journal of the Arnold Arboretum* 29: 1–48.
- Petit R, Bodenes C, Ducouso A, Roussel G & Kremer A. 2003. Hybridization as a mechanism of invasion in oaks. *New Phytologist* 161: 151–164.
- Prasad AM & Iverson LR. 2003. *Little's range and FIA importance value database for 135 eastern US tree species*. Delaware, Ohio: Northeastern Research Station, USDA Forest Service.
- Pritchard JK, Stephens M & Donnelly P. 2000. Inference of Population Structure Using Multilocus Genotype Data. *Genetics* 155: 945–959.
- R-Development-Core-Team. 2004. *R: A language and environment for statistical computing*. Vienna.

- Rieseberg LH, Wood TE & Baack EJ. 2006. The nature of plant species. *Nature (London)* 440: 524–527.
- Rosenberg NA. 2004. DISTRUCT<sup>□</sup>: a program for the graphical display of population structure. *Molecular Ecology Notes* 4: 137–138.
- Scotti-Saintagne C, Mariette S, Porth I, Goicoechea PG, Barreneche T, Bodenes C, Burg K & Kremer A. 2004. Genome Scanning for Interspecific Differentiation Between Two Closely Related Oak Species [*Quercus robur* L. and *Q. petraea* (Matt.) Liebl.]. *Genetics* 168: 1615–1626.
- Sokal RR & Michener CD. 1958. A statistical method for evaluating systematic relationships. *The University of Kansas Science Bulletin* 38: 1409–1438.
- Stebbins GL. 1950. *Variation and Evolution in Plants*. New York: Columbia University Press.
- Sullivan AR, Owusu SA, Weber JA, Hipp AL & Gailing O. 2016. Hybridization and divergence in multi-species oak (*Quercus*) communities. *Botanical Journal of the Linnean Society* 181: 99–114.
- Tovar-Sánchez E & Oyama K. 2004. Natural hybridization and hybrid zones between *Quercus crassifolia* and *Quercus crassipes* (Fagaceae) in Mexico: morphological and molecular evidence. *American Journal of Botany* 91: 1352–1363.
- Urbanek S. 2012. *proj4: A simple interface to the PROJ.4 cartographic projections library*.
- Van Valen L. 1976. Ecological species, multispecies, and oaks. *Taxon* 25: 233–239.
- Whittemore AT & Schaal BA. 1991. Interspecific gene flow in sympatric oaks. *Proceedings of the National Academy of Sciences USA* 88: 2540–2544.
- Wickham H. 2009. *ggplot2: Elegant Graphics for Data Analysis*. New York: Springer-Verlag.
- Wiegand KM. 1935. A taxonomist's experience with hybrids in the wild. *Science* 81: 161–166.
- Yarnell SH & Palmer EJ. 1933. Inheritance in an oak species hybrid. *Journal of the Arnold Arboretum* 14: 68–75.

### **Figure captions**

**Figure 1. Sampling map.** Sites were sampled to roughly cover the range of the taxa as known; on each panel, collections are overlaid on the range maps for *Quercus macrocarpa* (light blue), *Q. stellata* (pink) in the south, and *Q. bicolor* (orange) toward the north half of the range, following Little (1971, 1977, 1979). (A) *Quercus macrocarpa*. (B) *Quercus alba*. (C) *Quercus bicolor*, *Q. michauxii* and *Q. stellata*. (D) *Quercus prinoides*, *Q. muehlenbergii* and *Q. montana*.

**Figure 2. SNP heatmap by species.** Darkness of cells indicates the percent of individuals of a given named species possessing the indicated nucleotide. Red bars along the side of the figure indicate SNPs in 20 loci we hand-selected because they were highly decisive for the species represented in the present study.

**Figure 3. UPGMA, all loci (a) and 20 loci (b).** UPGMA was conducted on a Euclidean distance matrix calculated from a three-state nucleotide matrix, where each nucleotide present for each SNP is coded as 0 = absent, 1 = 1 copy (i.e., individual is heterozygous for that SNP), 2 = 2 copies (i.e., individual is homozygous for that SNP). (A) UPGMA clustering based on all 75 loci. (B) UPGMA clustering based on 20 loci hand-selected for their decisiveness in the species sample represented here (cf. Fig. 2, red bars).

**Figure 4. NMDS ordination, 75 loci.** Non-metric multidimensional scaling was conducted in three dimensions for the same Euclidean distance matrix utilized in the UPGMA figure reported above. NMDS ordination final stress was 0.08607 and failed to reach convergent solutions in 20 iterations, but all replicate ordination attempts distinguished all pairs of species in at least one dimension, as seen in this figure.

**Figure 5. Bayesian admixture analysis conducted in STRUCTURE, assuming  $K = 2$  to  $K = 9$  populations.** STRUCTURE analyses were conducted under the admixture model with correlated allele frequencies, from  $K = 1$  to  $K = 12$ . Values of  $K$  above 9 provide no additional information on population structure and are consequently not shown here. All figures represent averages over 10 independent runs of 1E06 generations each following 1E05 burn-in generations; runs were aggregated for display using the “greedy” algorithm in CLUMPP.

**Figure 6. The white oak syngameon of Eastern North America *sensu* Hardin 1975, including only the species investigated in the current study.** The figure replicates the 16-species figure of Hardin 1975 (his Fig. 1), including only the subset of seven species we investigated in the current study (treating *Q. muehlenbergii* and *Q. prinoides* as one), with lines indicating hybridizations that Hardin inferred from morphological study. Thin dashed lines indicate hybridizations identified by Hardin but not by us; medium dashed lines were identified by both Hardin and us, at an admixture level of 0.10 to 0.19 for at least one specimen; and thick dashed lines indicate admixture levels of 0.20 or higher for at least one specimen. Vouchers for leaf silhouettes are *Q. alba*: PS Manos 1838 [MOR 177669]; *Q. michauxii*: PS Manos 1843 [MOR 177659]; *Q. bicolor*: PS Manos 1847 [MOR 177662]; *Q. macrocarpa*: IL-MOR-MH108 [MOR 174544]; *Q. stellata*: PS Manos 1835 [MOR 177663]; *Q. muehlenbergii*: PM-98; *Q. montana*: PS Manos 1860 [MOR 177731].

**Table 1. Samples included in study.** Locality and coordinate data indicate source populations for both wild and cultivated material; where material is of cultivated source, no state or county

information are provided. Additional data on cultivated plants is provided in the supplement to this article. Replicates indicate technical replicates extracted from the same individual: individuals with the same replicate code are identical.

**Table 2. Sample sizes, sample distances and ranges, and overall species ranges.** Sample distance (D) maximum and median were calculated from Table 1 using the Haversine formula. Species ranges were inferred from range maps of Little (1971, 1977, 1979) for all species except *Q. prinoides*, which was estimated by visual inspection of maps published in Flora of North America (Nixon, 1977)

| Specimen    | Replicates | Latitude | Longitude | Species                   | Primary collector     | collectorNumber    | State of origin | County of origin | Locality of origin                                          | Source |
|-------------|------------|----------|-----------|---------------------------|-----------------------|--------------------|-----------------|------------------|-------------------------------------------------------------|--------|
| QUE000321   |            | Unknown  | Unknown   | <i>Quercus alba</i>       | Marlene Hahn          | CA-DAV-MH48        | Cultivated      | Cultivated       | Royal Botanical Gardens, Hamilton, Ontario: Went cultivated |        |
| QUE000128.a | ** A **    | 41.8649  | -86.3508  | <i>Quercus alba</i>       | Marlene Hahn          | IL-MOR-MH086       | MI              | Berrien          | Along St. Joseph River along River Trail on Fernwc          | wild   |
| QUE000128.b | ** A **    | 41.8649  | -86.3508  | <i>Quercus alba</i>       | Marlene Hahn          | IL-MOR-MH086       | MI              | Berrien          | Along St. Joseph River along River Trail on Fernwc          | wild   |
| QUE000596   |            | 39.9348  | -89.8016  | <i>Quercus alba</i>       | Marlene Hahn          | IL-SH-162          | IL              | Menard           | StarHill Forest spon, Petersburg,                           | wild   |
| QUE000151   |            | 45.3680  | -93.2193  | <i>Quercus alba</i>       | Carol DeVries         | IL-MOR-MH109       | MN              | Anoka            | on a farm                                                   | wild   |
| QUE000700   |            | 36.0218  | -79.0161  | <i>Quercus alba</i>       | Paul Manos            | PM-19              | NC              | Orange           | near crossroad Cornwallis Rd and Murphy School              | wild   |
| QUE001805   |            | 42.0421  | -93.6057  | <i>Quercus alba</i>       | Mira Garner           | IA-MG-262          | IA              | Story            | Ames, Veenker Memorial Golf Course(ISU)                     | wild   |
| QUE001815   |            | 40.7063  | -91.7939  | <i>Quercus alba</i>       | Mira Garner           | IA-MG-270          | IA              | Van Buren        | Bonaparte, Lindsay Wilderness                               | wild   |
| QUE001841   |            | 37.9732  | -92.7623  | <i>Quercus alba</i>       | Mira Garner           | MO-MG327           | MO              | Camden           | Ha Ha Tonka State Park                                      | wild   |
| QUE001918   |            | 34.8030  | -92.3260  | <i>Quercus alba</i>       | Mira Garner           | AR-MG387           | AR              | Pulaski          | Little Rock, Burns Park                                     | wild   |
| QUE001932   |            | 37.1573  | -91.3650  | <i>Quercus alba</i>       | Mira Garner           | MO-MG401           | MO              | Shannon          | Eminence, Buttin Rock Access, near trailer park             | wild   |
| QUE001884   |            | 36.2181  | -95.9000  | <i>Quercus alba</i>       | Mira Garner           | OK-MG353           | OK              | Tulsa            | Tulsa, Mohawk Park                                          | wild   |
| QUE002075   |            | 39.8393  | -88.3677  | <i>Quercus alba</i>       | Ian Pearse            | Chickenbristle 4   | IL              | Douglas          | Property of Bob Pearse                                      | wild   |
| QUE002091   |            | 38.7363  | -86.4143  | <i>Quercus alba</i>       | Mira Garner           | IN-MG612           | IN              | Lawrence         | Spring Mill State Park, Trail 5                             | wild   |
| QUE002108   |            | 40.4591  | -85.5092  | <i>Quercus alba</i>       | Mira Garner           | IN-MG629           | IN              | Grant            | Taylor Wilderness, Taylor University                        | wild   |
| QUE002121   |            | 41.6574  | -87.0605  | <i>Quercus alba</i>       | Mira Garner           | IN-MG642           | IN              | Porter           | Indiana Dunes State Park                                    | wild   |
| QUE002130   |            | 42.0161  | -73.3353  | <i>Quercus alba</i>       | Paul Gugger           | QUAL-1029          | CT              | Litchfield       | 1-19 Sand Rd, North Canaan, CT, US                          | wild   |
| QUE002138   |            | 43.6047  | -73.1804  | <i>Quercus alba</i>       | Paul Gugger           | QUAL-1037          | VT              | Rutland          | D&H Tri, Castleton, VT, US                                  | wild   |
| QUE002155   |            | 44.4464  | -73.2202  | <i>Quercus alba</i>       | Paul Gugger           | QUAL-1054          | VT              | Chittenden       | 1-225 Industrial Pkwy, Burlington, VT, US                   | wild   |
| QUE002210   |            | 38.2172  | -91.0864  | <i>Quercus alba</i>       | Mira Garner           | MO-MG586           | MO              | Crawford         | Meramec State Park, Sullivan, MO                            | wild   |
| QUE002253   |            | 38.9803  | -94.8053  | <i>Quercus alba</i>       | Mira Garner           | KS-MG433           | KS              | Johnson          | Shawnee Mission Park                                        | wild   |
| QUE002282   |            | 38.8096  | -95.1927  | <i>Quercus alba</i>       | Mira Garner           | KS-MG462           | KS              | Douglas          | Breidenthal Woods/Baldwin Woods                             | wild   |
| QUE002337   |            | 42.3047  | -83.7508  | <i>Quercus alba</i>       | Mira Garner           | MI-MG674           | MI              | Washtenaw        | Barton Nature Area, Ann Arbor, Off Trail                    | wild   |
| QUE002355   |            | 42.7666  | -84.3911  | <i>Quercus alba</i>       | Mira Garner           | MI-MG692           | MI              | Ingham           | Lake Lansing Park, East Lansing, Picnic Area                | wild   |
| QUE002366   |            | 43.0168  | -90.1142  | <i>Quercus alba</i>       | Mira Garner           | WI-MG703           | WI              | Iowa             | Governor Dodge State Park, Dodgeville, Cox Hollo            | wild   |
| QUE002399   |            | 43.0171  | -88.4353  | <i>Quercus alba</i>       | Mira Garner           | WI-MG736           | WI              | Waukesha         | University of Wisconsin - Waukesha Field Station, 'wild     |        |
| QUE002493   |            | 41.5522  | -84.3590  | <i>Quercus alba</i>       | Mira Garner           | OH-MG830           | OH              | Fulton           | Goll Woods State Nature Preserve                            | wild   |
| QUE000643   |            | 41.1922  | -87.4463  | <i>Quercus bicolor</i>    | Marlene Hahn          | IL-SH-030          | IN              | Lake             | Mohawk Club; Schneider.                                     | wild   |
| QUE000618   |            | 38.8931  | -94.8322  | <i>Quercus bicolor</i>    | Marlene Hahn          | IL-SH-184          | KS              | Johnson          |                                                             | wild   |
| QUE000136   |            | 41.7409  | -87.8603  | <i>Quercus bicolor</i>    | Marlene Hahn          | IL-MOR-MH094       | IL              | Cook             | Along the Des Plaines River near Willow Springs             | wild   |
| QUE001813   |            | 40.7048  | -91.7963  | <i>Quercus bicolor</i>    | Mira Garner           | IA-MG-268          | IA              | Van Buren        | Bonaparte, Lindsay Wilderness                               | wild   |
| QUE002153   |            | 44.4001  | -73.2375  | <i>Quercus bicolor</i>    | Paul Gugger           | QUBI-1052          | VT              | Chittenden       | 1136 Bay Rd, Shelburne, VT, US                              | wild   |
| QUE002196   |            | 38.2267  | -91.0830  | <i>Quercus bicolor</i>    | Mira Garner           | MO-MG572           | MO              | Crawford         | Meramec State Park, Sullivan, MO, Campground                | wild   |
| QUE002360   |            | 42.7951  | -84.3927  | <i>Quercus bicolor</i>    | Mira Garner           | MI-MG697           | MI              | Ingham           | Lake Lansing Park, East Lansing, Edge of marsh              | wild   |
| QUE002361   |            | 42.7653  | -84.3825  | <i>Quercus bicolor</i>    | Mira Garner           | MI-MG698           | MI              | Ingham           | Lake Lansing Park, East Lansing, Edge of marsh              | wild   |
| QUE002528   |            | 42.1843  | -87.9163  | <i>Quercus bicolor</i>    | Mira Garner           | IL-MG865           | IL              | Lake             | Ryerson Woods Conservation Area, Trail behind ca            | wild   |
| QUE002539   |            | 41.8245  | -87.9333  | <i>Quercus bicolor</i>    | Mira Garner           | IL-MG876           | IL              | DuPage           | Fullersburg Woods Nature Preserve                           | wild   |
| QUE000671   |            | 40.4554  | -86.9165  | <i>Quercus macrocarpa</i> | Bethany Hayward Brown | IL-SH-58           | IN              | Wabash           | West Lafayette                                              | wild   |
| QUE000623   |            | 40.1923  | -96.6650  | <i>Quercus macrocarpa</i> | Marlene Hahn          | IL-SH-189          | NE              | Gage             | Blue River, via NSA 2000                                    | wild   |
| QUE000619   |            | 36.6467  | -89.3021  | <i>Quercus macrocarpa</i> | Marlene Hahn          | IL-SH-185          | MO              | Lake             | Big Oak Tree State Park                                     | wild   |
| QUE000640   |            | 38.3507  | -87.8226  | <i>Quercus macrocarpa</i> | Marlene Hahn          | IL-SH-027          | IL              | Wabash           | Beall Woods State Park                                      | wild   |
| QUE000107   |            | 41.4868  | -87.7998  | <i>Quercus macrocarpa</i> | Marlene Hahn          | IL-MOR-MH003 (A/B) | IL              | Cook             | Near Sauk Lake in Sauk Trail Forest Preserve                | wild   |
| QUE000617   |            | 48.3076  | -98.7287  | <i>Quercus macrocarpa</i> | Marlene Hahn          | IL-SH-183          | ND              | Ramsey           |                                                             | wild   |
| QUE000673   |            | 39.7799  | -96.0153  | <i>Quercus macrocarpa</i> | Bethany Hayward Brown | IL-SH-060          | KS              | Nemaha           |                                                             | wild   |
| QUE000622   |            | 35.6239  | -99.0087  | <i>Quercus macrocarpa</i> | Marlene Hahn          | IL-SH-188          | OK              | Custer           |                                                             | wild   |
| QUE000672   |            | 45.5029  | -104.4767 | <i>Quercus macrocarpa</i> | Bethany Hayward Brown | IL-SH-59           | MT              | Carter           |                                                             | wild   |
| QUE000620   |            | 33.6067  | -105.3631 | <i>Quercus macrocarpa</i> | Marlene Hahn          | IL-SH-186          | NM              |                  | Capitan Mountains                                           | wild   |
| QUE000624   |            | 45.5039  | -73.5545  | <i>Quercus macrocarpa</i> | Marlene Hahn          | IL-SH-190          | Quebec          |                  | Montreal                                                    | wild   |
| QUE001759   |            | 43.1070  | -89.8083  | <i>Quercus macrocarpa</i> | Mira Garner           | WI-MG230           | WI              | Dane             | Pleasant Valley Conservancy                                 | wild   |
| QUE001804   |            | 42.0421  | -93.6062  | <i>Quercus macrocarpa</i> | Mira Garner           | IA-MG-261          | IA              | Story            | Ames, Veenker Memorial Golf Course(ISU)                     | wild   |
| QUE001814   |            | 40.7056  | -91.7942  | <i>Quercus macrocarpa</i> | Mira Garner           | IA-MG-269          | IA              | Van Buren        | Bonaparte, Lindsay Wilderness                               | wild   |
| QUE001863   |            | 36.8450  | -96.4253  | <i>Quercus macrocarpa</i> | Mira Garner           | OK-MG282           | OK              | Osage            | Pawhuska, Tallgrass Prairie Preserve                        | wild   |
| QUE001894   |            | 35.4438  | -98.3545  | <i>Quercus macrocarpa</i> | Mira Garner           | OK-MG363           | OK              | Caddo            | Hinton, Red Rock Canyon State Park                          | wild   |
| QUE001916   |            | 34.8038  | -92.3263  | <i>Quercus macrocarpa</i> | Mira Garner           | AR-MG385           | AR              | Pulaski          | Little Rock, Burns Park                                     | wild   |
| QUE001933   |            | 37.1569  | -91.3647  | <i>Quercus macrocarpa</i> | Mira Garner           | MO-MG402           | MO              | Shannon          | Eminence, Buttin Rock Access, near river                    | wild   |
| QUE001783   |            | 41.9736  | -91.7239  | <i>Quercus macrocarpa</i> | Mira Garner           | IA-MG-239          | IA              | Linn             | Cedar Rapids, Cherokee Park                                 | wild   |
| QUE001880   |            | 36.2204  | -95.8985  | <i>Quercus macrocarpa</i> | Mira Garner           | OK-MG349           | OK              | Tulsa            | Tulsa, Mohawk Park                                          | wild   |
| QUE001907   |            | 35.1769  | -97.4497  | <i>Quercus macrocarpa</i> | Mira Garner           | OK-MG376           | OK              | Cleveland        | Norman, Oliver's Woods, University of Oklahoma c            | wild   |
| QUE001937   |            | 43.9029  | -91.6400  | <i>Quercus macrocarpa</i> | Mira Garner           | MN-MG493           | MN              | Winona           | Winona, Prairie Moon Nursery, Wiscoy Co-op, in w            | wild   |
| QUE001951   |            | 49.7138  | -95.2439  | <i>Quercus macrocarpa</i> | Mira Garner           | MB-MG507           | Manitoba        |                  | Whiteshell Provincial Park                                  | wild   |
| QUE001963   |            | 49.7614  | -99.1604  | <i>Quercus macrocarpa</i> | Mira Garner           | MB-MG519           | Manitoba        |                  | Spruce Woods Provincial Park                                | wild   |
| QUE001971   |            | 49.8578  | -97.2491  | <i>Quercus macrocarpa</i> | Mira Garner           | MB-MG527           | Manitoba        |                  | Assiniboine Forest, near trail                              | wild   |
| QUE001982   |            | 46.0259  | -91.1429  | <i>Quercus macrocarpa</i> | Mira Garner           | WI-MG538           | WI              | Sawyer           | Round Lake, Chequamegon-Nicolet National Fores              | wild   |
| QUE002057   |            | 38.9636  | -98.5891  | <i>Quercus macrocarpa</i> | Ian Pearse            | Minooka 2          | KS              | Russell          | Minooka Park Recreation Area                                | wild   |
| QUE002074   |            | 39.8393  | -88.3677  | <i>Quercus macrocarpa</i> | Ian Pearse            | Chickenbristle 3   | IL              | Douglas          | Property of Bob Pearse                                      | wild   |
| QUE002081   |            | 37.5149  | -89.4445  | <i>Quercus macrocarpa</i> | Mira Garner           | IL-MG602           | IL              | Jackson          | Oakwood Bottoms, Shawnee National Forest, Alon              | wild   |
| QUE002082   |            | 37.5164  | -89.4454  | <i>Quercus macrocarpa</i> | Mira Garner           | IL-MG603           | IL              | Jackson          | Oakwood Bottoms, Shawnee National Forest, Alon              | wild   |
| QUE002085   |            | 38.7362  | -86.4126  | <i>Quercus macrocarpa</i> | Mira Garner           | IN-MG606           | IN              | Lawrence         | Spring Mill State Park, Near trail/lake                     | wild   |
| QUE002102   |            | 40.4591  | -85.5041  | <i>Quercus macrocarpa</i> | Mira Garner           | IN-MG623           | IN              | Grant            | Taylor Wilderness, Taylor University                        | wild   |
| QUE002129   |            | 41.9623  | -73.3130  | <i>Quercus macrocarpa</i> | Paul Gugger           | QUMAC-1028         | CT              | Litchfield       | Litchfield County, US-CT, US                                | wild   |
| QUE002133   |            | 42.1666  | -73.4121  | <i>Quercus macrocarpa</i> | Paul Gugger           | QUMAC-1032         | MA              | Berkshire        | 16-18 Creamery Rd, Egremont, MA, US                         | wild   |
| QUE002137   |            | 43.6034  | -73.1811  | <i>Quercus macrocarpa</i> | Paul Gugger           | QUMAC-1036         | VT              | Rutland          | D&H Tri, Castleton, VT, US                                  | wild   |
| QUE002154   |            | 44.4007  | -73.2376  | <i>Quercus macrocarpa</i> | Paul Gugger           | QUMAC-1053         | VT              | Chittenden       | Shelburne Bay, Shelburne, VT, US                            | wild   |
| QUE002208   |            | 38.2283  | -91.0824  | <i>Quercus macrocarpa</i> | Mira Garner           | MO-MG584           | MO              | Crawford         | Meramec State Park, Sullivan, MO, Campground                | wild   |
| QUE002251   |            | 38.9801  | -94.8052  | <i>Quercus macrocarpa</i> | Mira Garner           | KS-MG431           | KS              | Johnson          | Shawnee Mission Park                                        | wild   |
| QUE002284   |            | 38.8087  | -95.1939  | <i>Quercus macrocarpa</i> | Mira Garner           | KS-MG464           | KS              | Douglas          | Breidenthal Woods/Baldwin Woods                             | wild   |
| QUE002295   |            | 39.1071  | -96.6077  | <i>Quercus macrocarpa</i> | Mira Garner           | KS-MG475           | KS              | Riley            | Konza Prairie, Manhattan, KS, Near nature trail-alc         | wild   |
| QUE002302   |            | 39.1034  | -96.5962  | <i>Quercus macrocarpa</i> | Mira Garner           | KS-MG482           | KS              | Riley            | Konza Prairie, Manhattan, KS, Along King's Creek            | wild   |
| QUE002326   |            | 43.8532  | -83.9230  | <i>Quercus macrocarpa</i> | Mira Garner           | MI-MG663           | MI              | Bay              | Pinconning Park, Campground                                 | wild   |
| QUE002336   |            | 42.3084  | -83.7567  | <i>Quercus macrocarpa</i> | Mira Garner           | MI-MG673           | MI              | Washtenaw        | Barton Nature Area, Ann Arbor, Picnic Area                  | wild   |
| QUE002356   |            | 42.7651  | -84.3890  | <i>Quercus macrocarpa</i> | Mira Garner           | MI-MG693           | MI              | Ingham           | Lake Lansing Park, East Lansing, Edge of marsh              | wild   |
| QUE002367   |            | 43.0169  | -90.1148  | <i>Quercus macrocarpa</i> | Mira Garner           | WI-MG704           | WI              | Iowa             | Governor Dodge State Park, Dodgeville, Cox Hollo            | wild   |
| QUE002400   |            | 43.0161  | -88.4351  | <i>Quercus macrocarpa</i> | Mira Garner           | WI-MG737           | WI              | Waukesha         | University of Wisconsin - Waukesha Field Station, 'wild     |        |



|           |         |           |                           |                              |                       |               |            |                                                    |                                                               |
|-----------|---------|-----------|---------------------------|------------------------------|-----------------------|---------------|------------|----------------------------------------------------|---------------------------------------------------------------|
| QUE002424 | 44.3639 | -93.9354  | <i>Quercus macrocarpa</i> | Mira Garner                  | MN-MG761              | MN            | Le Sueur   | Ottawa Bluffs                                      | wild                                                          |
| QUE002436 | 45.5300 | -94.2364  | <i>Quercus macrocarpa</i> | Mira Garner                  | MN-MG773              | MN            | Stearns    | Quarry Park State Natural Area, Waite Park         | wild                                                          |
| QUE002471 | 40.7312 | -83.0933  | <i>Quercus macrocarpa</i> | Mira Garner                  | OH-MG808              | OH            | Crawford   | Daughmer Prairie Savannah State Nature Preserve    | wild                                                          |
| QUE002480 | 41.5507 | -84.3597  | <i>Quercus macrocarpa</i> | Mira Garner                  | OH-MG817              | OH            | Fulton     | Goll Woods State Nature Preserve                   | wild                                                          |
| QUE002579 | 43.8168 | -103.2501 | <i>Quercus macrocarpa</i> | Jeanne Cavender-Bares        | JCB-SD-US16-1010      | SD            | Custer     | East of Custer State Park driving eastward towards | wild                                                          |
| QUE002585 | 44.4673 | -103.8498 | <i>Quercus macrocarpa</i> | Jeanne Cavender-Bares        | JCB-SD-SPF-1016       | SD            | Lawrence   | heading towards Spearfish                          | wild                                                          |
| QUE002717 | ** B ** | 38.9057   | -86.0359                  | <i>Quercus michauxii</i>     | Elisabeth Fitzek      | 645-48*2      | IN         | Jackson                                            | wild                                                          |
| QUE000121 | ** B ** | 38.9057   | -86.0359                  | <i>Quercus michauxii</i>     | Laurie Glaysher       | IL-MOR-MH079  | IN         | Jackson                                            | wild                                                          |
| QUE002718 |         | Unknown   | Unknown                   | <i>Quercus michauxii</i>     | Elisabeth Fitzek      | 476-42*1      | Cultivated | Cultivated                                         | Graft from University of Washington Botanic Garden cultivated |
| QUE002719 |         | 36.6447   | -89.2850                  | <i>Quercus michauxii</i>     | Elisabeth Fitzek      | 539-96*3      | MO         | Mississippi                                        | In picnic ground at Big Oak Tree State Park.                  |
| QUE002679 |         | 36.6447   | -89.2850                  | <i>Quercus michauxii</i>     | Carol DeVries         | IL-MOR-MH250  | MO         | Mississippi                                        | In picnic ground at Big Oak Tree State Park.                  |
| QUE002680 |         | 36.6447   | -89.2850                  | <i>Quercus michauxii</i>     | Marilyn Carle         | IL-MOR-MH251  | MO         | Mississippi                                        | In picnic ground at Big Oak Tree State Park.                  |
| QUE002720 | ** C ** | 36.6447   | -89.2850                  | <i>Quercus michauxii</i>     | Elisabeth Fitzek      | 539-96*5      | MO         | Mississippi                                        | In picnic ground at Big Oak Tree State Park.                  |
| QUE000105 | ** C ** | 36.6447   | -89.2850                  | <i>Quercus michauxii</i>     | Ken Potenberg         | IL-MOR-MH001  | MO         | Mississippi                                        | In picnic ground at Big Oak Tree State Park.                  |
| QUE000588 |         | 37.1538   | -89.3470                  | <i>Quercus michauxii</i>     | Bethany Hayward Brown | IL-SH-154     | IL         |                                                    | Horseshoe Lake; Olive Branch                                  |
| QUE001116 |         | 35.9956   | -79.0542                  | <i>Quercus michauxii</i>     | Paul Manos            | PM143         | NC         | Orange                                             | Jonston Mill Preserve                                         |
| QUE001128 |         | 36.0152   | -78.9233                  | <i>Quercus michauxii</i>     | Paul Manos            | PM155         | NC         | Durham                                             | Edith Street Durham, NC                                       |
| QUE002722 |         | 37.1414   | -79.9957                  | <i>Quercus montana</i>       | Elisabeth Fitzek      | 606-2000*3    | VA         | Franklin                                           | Canas Mt.                                                     |
| QUE002723 | ** D ** | 37.5258   | -80.2497                  | <i>Quercus montana</i>       | Elisabeth Fitzek      | 602-2000*2    | VA         | Craig                                              | At picnic area across from entrance to county road            |
| QUE000122 | ** D ** | 37.5258   | -80.2497                  | <i>Quercus montana</i>       | Evelyn Means          | IL-MOR-MH080  | VA         | Craig                                              | At picnic area across from entrance to county road            |
| QUE002724 |         | 37.5258   | -80.2497                  | <i>Quercus montana</i>       | Elisabeth Fitzek      | 602-2000*1    | VA         |                                                    | At picnic area across from entrance to county road            |
| QUE002725 |         | 37.5258   | -80.2497                  | <i>Quercus montana</i>       | Elisabeth Fitzek      | 602-2000*3    | VA         |                                                    | At picnic area across from entrance to county road            |
| QUE000639 |         | 37.6179   | -88.7048                  | <i>Quercus montana</i>       | Marlene Hahn          | IL-SH-26      | IL         |                                                    | near Stonefort                                                |
| QUE000111 |         | 37.1414   | -79.9957                  | <i>Quercus montana</i>       | Marlene Hahn          | IL-MOR-MH007  | VA         | Franklin                                           | Canas Mt                                                      |
| QUE000576 |         | 35.4291   | -82.2518                  | <i>Quercus montana</i>       | Bethany Hayward Brown | IL-SH-116     | NC         |                                                    | Chimney Rock Park                                             |
| QUE002726 |         | Unknown   | Unknown                   | <i>Quercus muehlenbergii</i> | Elisabeth Fitzek      | 704-46*2      | IN         |                                                    | wild                                                          |
| QUE002727 |         | Unknown   | Unknown                   | <i>Quercus muehlenbergii</i> | Elisabeth Fitzek      | 704-63*3      | IN         |                                                    | wild                                                          |
| QUE000152 |         | 40.6715   | -95.7047                  | <i>Quercus muehlenbergii</i> | Chris Courtney        | IL-MOR-MH110  | IA         | Fremont                                            | 8 mi. east of Nebraska City, south of IA 2, on top of         |
| QUE000587 |         | 39.9352   | -89.8023                  | <i>Quercus muehlenbergii</i> | Bethany Hayward Brown | IL-SH-153     | IL         | Menard                                             | Petersburg, Starhill Forest Spont.                            |
| QUE000145 |         | 41.2106   | -88.0176                  | <i>Quercus muehlenbergii</i> | Marlene Hahn          | IL-MOR-MH103  | IL         | Will                                               | In campground north of the Kankakee River under               |
| QUE000670 |         | 35.6239   | -99.0087                  | <i>Quercus muehlenbergii</i> | Bethany Hayward Brown | IL-SH-57      | OK         | Custer                                             | wild                                                          |
| QUE000322 |         | 31.9792   | -104.7542                 | <i>Quercus muehlenbergii</i> | Marlene Hahn          | CA-DAV-MH49   | TX         | Culberson                                          | Guadalupe Mountains:McKittrick Canyon: 0.6 Mile               |
| QUE001819 |         | 40.7048   | -91.7959                  | <i>Quercus muehlenbergii</i> | Mira Garner           | IA-MG-274     | IA         | Van Buren                                          | Bonaparte, Lindsay Wilderness                                 |
| QUE001840 |         | 37.9730   | -92.7622                  | <i>Quercus muehlenbergii</i> | Mira Garner           | MO-MG326      | MO         | Camden                                             | Ha Ha Tonka State Park                                        |
| QUE001893 |         | 35.4481   | -98.3535                  | <i>Quercus muehlenbergii</i> | Mira Garner           | OK-MG362      | OK         | Caddo                                              | Hinton, Red Rock Canyon State Park                            |
| QUE002086 |         | 38.7363   | -86.4125                  | <i>Quercus muehlenbergii</i> | Mira Garner           | IN-MG607      | IN         | Lawrence                                           | Spring Mill State Park, Trail 5                               |
| QUE002098 |         | 38.7374   | -86.4126                  | <i>Quercus muehlenbergii</i> | Mira Garner           | IN-MG619      | IN         | Lawrence                                           | Spring Mill State Park, Roadside near Nature Cent             |
| QUE002101 |         | 40.4589   | -85.5038                  | <i>Quercus muehlenbergii</i> | Mira Garner           | IN-MG622      | IN         | Grant                                              | Taylor Wilderness, Taylor University, Off Eighth Str          |
| QUE002105 |         | 40.4592   | -85.5081                  | <i>Quercus muehlenbergii</i> | Mira Garner           | IN-MG626      | IN         | Grant                                              | Taylor Wilderness, Taylor University                          |
| QUE002189 |         | 38.5114   | -90.5592                  | <i>Quercus muehlenbergii</i> | Mira Garner           | MO-MG565      | MO         | St. Louis                                          | Tyson Research Center, Eureka, MO                             |
| QUE002247 |         | 38.9789   | -94.8050                  | <i>Quercus muehlenbergii</i> | Mira Garner           | KS-MG427      | KS         | Johnson                                            | Shawnee Mission Park                                          |
| QUE002250 |         | 38.9739   | -94.8051                  | <i>Quercus muehlenbergii</i> | Mira Garner           | KS-MG430      | KS         | Johnson                                            | Shawnee Mission Park                                          |
| QUE002285 |         | 38.8087   | -95.1939                  | <i>Quercus muehlenbergii</i> | Mira Garner           | KS-MG465      | KS         | Douglas                                            | Breidenthal Woods/Baldwin Woods                               |
| QUE002303 |         | 39.1016   | -96.5998                  | <i>Quercus muehlenbergii</i> | Mira Garner           | KS-MG483      | KS         | Riley                                              | Konza Prairie, Manhattan, KS                                  |
| QUE002304 |         | 39.1079   | -96.6047                  | <i>Quercus muehlenbergii</i> | Mira Garner           | KS-MG484      | KS         | Riley                                              | Konza Prairie, Manhattan, KS, Along nature trail              |
| QUE002481 |         | 41.5510   | -84.3585                  | <i>Quercus muehlenbergii</i> | Mira Garner           | OH-MG818      | OH         | Fulton                                             | Goll Woods State Nature Preserve                              |
| QUE002699 |         | 40.0499   | -95.7298                  | <i>Quercus prinoides</i>     | Chris Courtney        | IL-MOR-MH270  | NE         | Richardson                                         | Rock Creek bluffs, 3 miles south of Salem                     |
| QUE002695 |         | 39.8189   | -94.0103                  | <i>Quercus prinoides</i>     | Satish Sachdev        | IL-MOR-MH266  | MO         |                                                    | Northwestern section of Missouri.                             |
| QUE002728 |         | 40.0383   | -95.7565                  | <i>Quercus prinoides</i>     | Elisabeth Fitzek      | 120-2001*2    | NE         | Richardson                                         | plant grown from wild seed southwest of Salem.                |
| QUE002729 |         | 40.0383   | -95.7565                  | <i>Quercus prinoides</i>     | Elisabeth Fitzek      | 120-2001*3    | NE         | Richardson                                         | plant grown from wild seed southwest of Salem.                |
| QUE002730 |         | Unknown   | Unknown                   | <i>Quercus prinoides</i>     | Elisabeth Fitzek      | 218-77*2      | Cultivated | Cultivated                                         | Seed from MOR accession 742-51                                |
| QUE002731 |         | Unknown   | Unknown                   | <i>Quercus prinoides</i>     | Elisabeth Fitzek      | 218-77*3      | Cultivated | Cultivated                                         | Seed from MOR accession 742-51                                |
| QUE002689 |         | Unknown   | Unknown                   | <i>Quercus prinoides</i>     | Sarah Packard         | IL-MOR-MH260  | Cultivated | Cultivated                                         | Seed from MOR accession 742-51                                |
| QUE002701 |         | 40.7925   | -77.8621                  | <i>Quercus prinoides</i>     | NA                    | IL-MOR-MH272  | PA         |                                                    | State College grounds                                         |
| QUE002694 | ** E ** | 40.7925   | -77.8621                  | <i>Quercus prinoides</i>     | Marilyn Carle         | IL-MOR-MH265  | PA         |                                                    | State College grounds                                         |
| QUE000133 | ** E ** | 40.7925   | -77.8621                  | <i>Quercus prinoides</i>     | Ken Potenberg         | IL-MOR-MH091  | PA         |                                                    | State College grounds                                         |
| QUE002693 |         | 39.8189   | -94.0103                  | <i>Quercus prinoides</i>     | Edie Moran            | IL-MOR-MH264  | MO         |                                                    | Northwestern section of Missouri.                             |
| QUE002696 |         | 39.8189   | -94.0103                  | <i>Quercus prinoides</i>     | Chris Courtney        | IL-MOR-MH267  | MO         |                                                    | Northwestern section of Missouri.                             |
| QUE002697 |         | 40.7925   | -77.8621                  | <i>Quercus prinoides</i>     | Charlene Kubic        | IL-MOR-MH268  | PA         |                                                    | State College grounds                                         |
| QUE002698 |         | 40.7925   | -77.8621                  | <i>Quercus prinoides</i>     | Chris Courtney        | IL-MOR-MH269  | PA         |                                                    | State College grounds                                         |
| QUE002700 |         | 40.0499   | -95.7298                  | <i>Quercus prinoides</i>     | Charlene Kubic        | IL-MOR-MH271  | NE         | Richardson                                         | Rock Creek bluffs, 3 miles south of Salem                     |
| QUE000565 |         | 38.4676   | -95.1365                  | <i>Quercus prinoides</i>     | Andrew Hipp           | IL-SH-105     | KS         | Franklin                                           | 3.5 mi. NW of Lane                                            |
| QUE000678 |         | 40.0763   | -95.7210                  | <i>Quercus prinoides</i>     | Marlene Hahn          | IL-SH-96      | NE         | Richardson                                         | SW of Salem                                                   |
| QUE000753 |         | 42.0015   | -76.5991                  | <i>Quercus prinoides</i>     | EA Cope               | PM93          | NY         | Chemung                                            | wild                                                          |
| QUE002683 |         | 40.6487   | -91.6733                  | <i>Quercus stellata</i>      | Satish Sachdev        | IL-MOR-MH254  | IA         | Lee                                                | in the Donnellson Unit of Shimek State Forest                 |
| QUE002732 |         | 37.0922   | -93.8381                  | <i>Quercus stellata</i>      | Elisabeth Fitzek      | 11-86*2       | MO         | Lawrence                                           | wild                                                          |
| QUE002733 |         | 37.0922   | -93.8381                  | <i>Quercus stellata</i>      | Elisabeth Fitzek      | 11-86*3       | MO         | Lawrence                                           | wild                                                          |
| QUE002734 | ** F ** | 38.0349   | -91.5203                  | <i>Quercus stellata</i>      | Elisabeth Fitzek      | 1137-2004*2   | MO         | Phelps                                             | Along I-44 and RR at Rosati                                   |
| QUE000143 | ** F ** | 38.0349   | -91.5203                  | <i>Quercus stellata</i>      | Marlene Hahn          | IL-MOR-MH101  | MO         | Phelps                                             | Along I-44 and RR at Rosati                                   |
| QUE002735 |         | 38.0349   | -91.5203                  | <i>Quercus stellata</i>      | Elisabeth Fitzek      | 1137-2004*3   | MO         | Phelps                                             | Along I-44 and RR at Rosati                                   |
| QUE002704 |         | 40.6487   | -91.6733                  | <i>Quercus stellata</i>      | Ken Potenberg         | IL-MOR-MH275  | IA         | Lee                                                | in the Donnellson Unit of Shimek State Forest                 |
| QUE002703 |         | 40.6487   | -91.6733                  | <i>Quercus stellata</i>      | Ken Potenberg         | IL-MOR-MH274  | IA         | Lee                                                | in the Donnellson Unit of Shimek State Forest                 |
| QUE002706 | ** G ** | 40.6487   | -91.6733                  | <i>Quercus stellata</i>      | Bethany Hayward Brown | IL-MOR-MH277  | IA         | Lee                                                | in the Donnellson Unit of Shimek State Forest                 |
| QUE000137 | ** G ** | 40.6487   | -91.6733                  | <i>Quercus stellata</i>      | Marlene Hahn          | IL-MOR-MH095  | IA         | Lee                                                | in the Donnellson Unit of Shimek State Forest                 |
| QUE000608 |         | 38.7272   | -88.7795                  | <i>Quercus stellata</i>      | Bethany Hayward Brown | IL-SH-174     | IL         | Marion                                             | Forbes State Recreation Area                                  |
| QUE000638 |         | 37.9995   | -91.6092                  | <i>Quercus stellata</i>      | Marlene Hahn          | IL-SH-25      | MO         | Phelps                                             | Hillview Haven; St. James                                     |
| QUE000692 |         | 35.9767   | -78.9866                  | <i>Quercus stellata</i>      | Paul Manos            | PM11          | NC         | Durham                                             | Durham county; 3658 Pineview Circle                           |
| QUE001118 |         | 36.0187   | -78.9253                  | <i>Quercus stellata</i>      | Paul Manos            | PS Manos 1907 | NC         | Durham                                             | Watts Hillandale tree Intersection of Carolina Aven           |
| QUE001839 |         | 37.9729   | -92.7622                  | <i>Quercus stellata</i>      | Mira Garner           | MO-MG325      | MO         | Camden                                             | Ha Ha Tonka State Park                                        |
| QUE001862 |         | 36.8491   | -96.4152                  | <i>Quercus stellata</i>      | Mira Garner           | OK-MG281      | OK         | Osage                                              | Pawhuska, Tallgrass Prairie Preserve                          |
| QUE001915 |         | 34.8041   | -92.3267                  | <i>Quercus stellata</i>      | Mira Garner           | AR-MG384      | AR         | Pulaski                                            | Little Rock, Burns Park                                       |
| QUE002187 |         | 38.5109   | -90.5599                  | <i>Quercus stellata</i>      | Mira Garner           | MO-MG563      | MO         | St. Louis                                          | Tyson Research Center, Eureka, MO                             |
| QUE002188 |         | 38.5115   | -90.5592                  | <i>Quercus stellata</i>      | Mira Garner           | MO-MG564      | MO         | St. Louis                                          | Tyson Research Center, Eureka, MO                             |
| QUE002209 |         | 38.2181   | -91.0836                  | <i>Quercus stellata</i>      | Mira Garner           | MO-MG585      | MO         | Crawford                                           | Meramec State Park, Sullivan, MO                              |



|           |         |          |                         |             |          |    |          |                                                  |      |
|-----------|---------|----------|-------------------------|-------------|----------|----|----------|--------------------------------------------------|------|
| QUE002219 | 38.2179 | -91.0921 | <i>Quercus stellata</i> | Mira Garner | MO-MG595 | MO | Crawford | Meramec State Park, Sullivan, MO, Deer Hollow Tr | wild |
| QUE002252 | 38.9801 | -94.8050 | <i>Quercus stellata</i> | Mira Garner | KS-MG432 | KS | Johnson  | Shawnee Mission Park                             | wild |
| QUE002283 | 38.8096 | -95.1927 | <i>Quercus stellata</i> | Mira Garner | KS-MG463 | KS | Douglas  | Breidenthal Woods/Baldwin Woods                  | wild |

|                              | <u>N</u> | <u>Sample D max (km)</u> | <u>Sample D median (km)</u> | <u>Sample latitude</u> | <u>Species latitude</u> | <u>Sample longitude</u> | <u>Species longitude</u> |
|------------------------------|----------|--------------------------|-----------------------------|------------------------|-------------------------|-------------------------|--------------------------|
| <i>Quercus macrocarpa</i>    | 52       | 3005.3                   | 888.8                       | 33.6, 49.9             | 28, 52.7                | -105.4, -73.2           | -104.4, -66.1            |
| <i>Quercus alba</i>          | 26       | 2120.1                   | 695                         | 34.8, 45.4             | 29.6, 46.5              | -95.9, -73.2            | -96.3, -69.1             |
| <i>Quercus muehlenbergii</i> | 21       | 2098.3                   | 543                         | 32, 41.6               | 24.8, 44.7              | -104.8, -84.4           | -105.2, -72.2            |
| <i>Quercus stellata</i>      | 21       | 1565.6                   | 325.6                       | 34.8, 40.6             | 27.6, 41.8              | -96.4, -78.9            | -101.4, -70              |
| <i>Quercus prinoides</i>     | 17       | 1618.9                   | 185.9                       | 38.5, 42               | 34.1, 42.9              | -95.8, -76.6            | -99.8, -70               |
| <i>Quercus bicolor</i>       | 10       | 1889.8                   | 453.4                       | 38.2, 44.4             | 35.2, 46.4              | -94.8, -73.2            | -96.4, -70               |
| <i>Quercus michauxii</i>     | 9        | 939                      | 380.5                       | 36, 38.9               | 28.8, 41                | -89.3, -78.9            | -95.5, -74.3             |
| <i>Quercus montana</i>       | 7        | 771.3                    | 277.8                       | 35.4, 37.6             | 32, 44.6                | -88.7, -80              | -90, -70.5               |

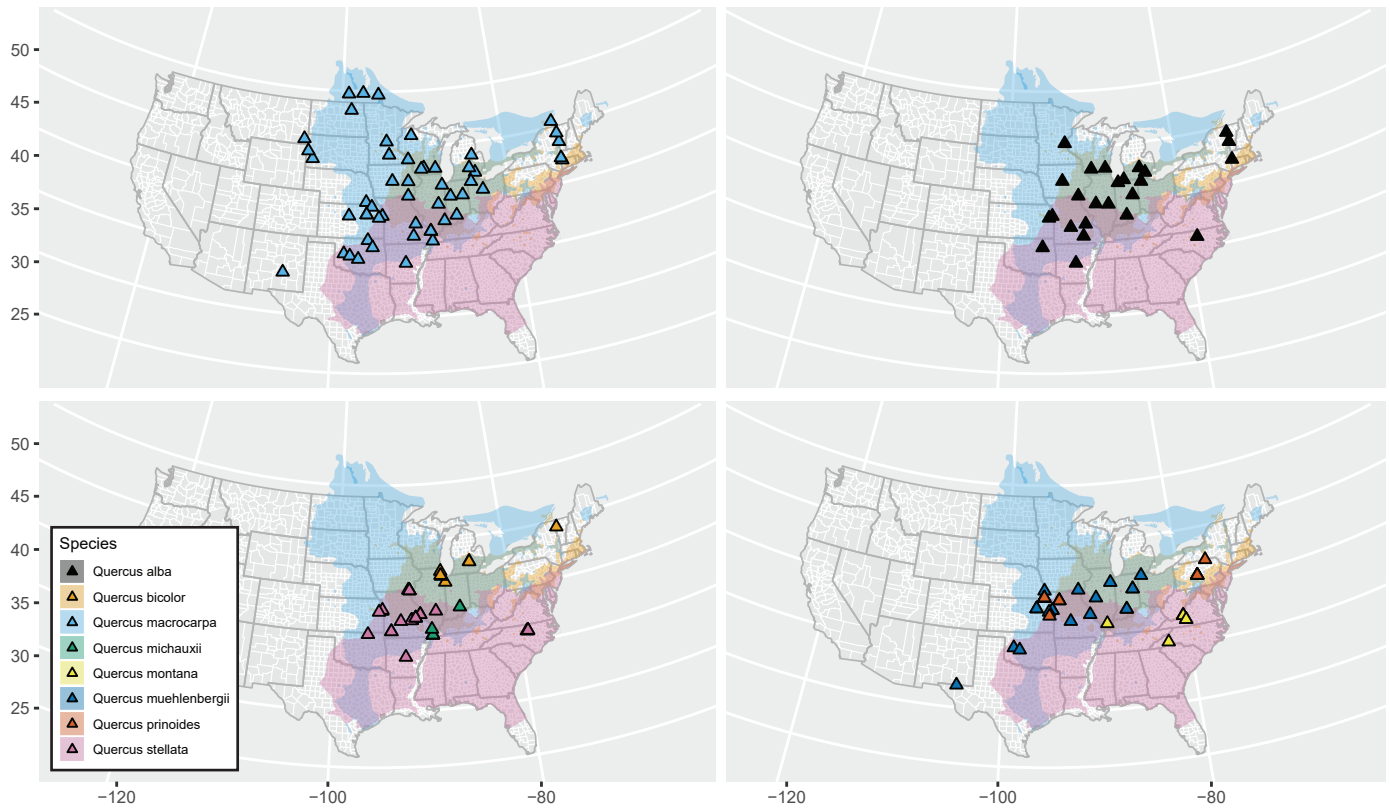

■ Alleles from 20 handpicked loci

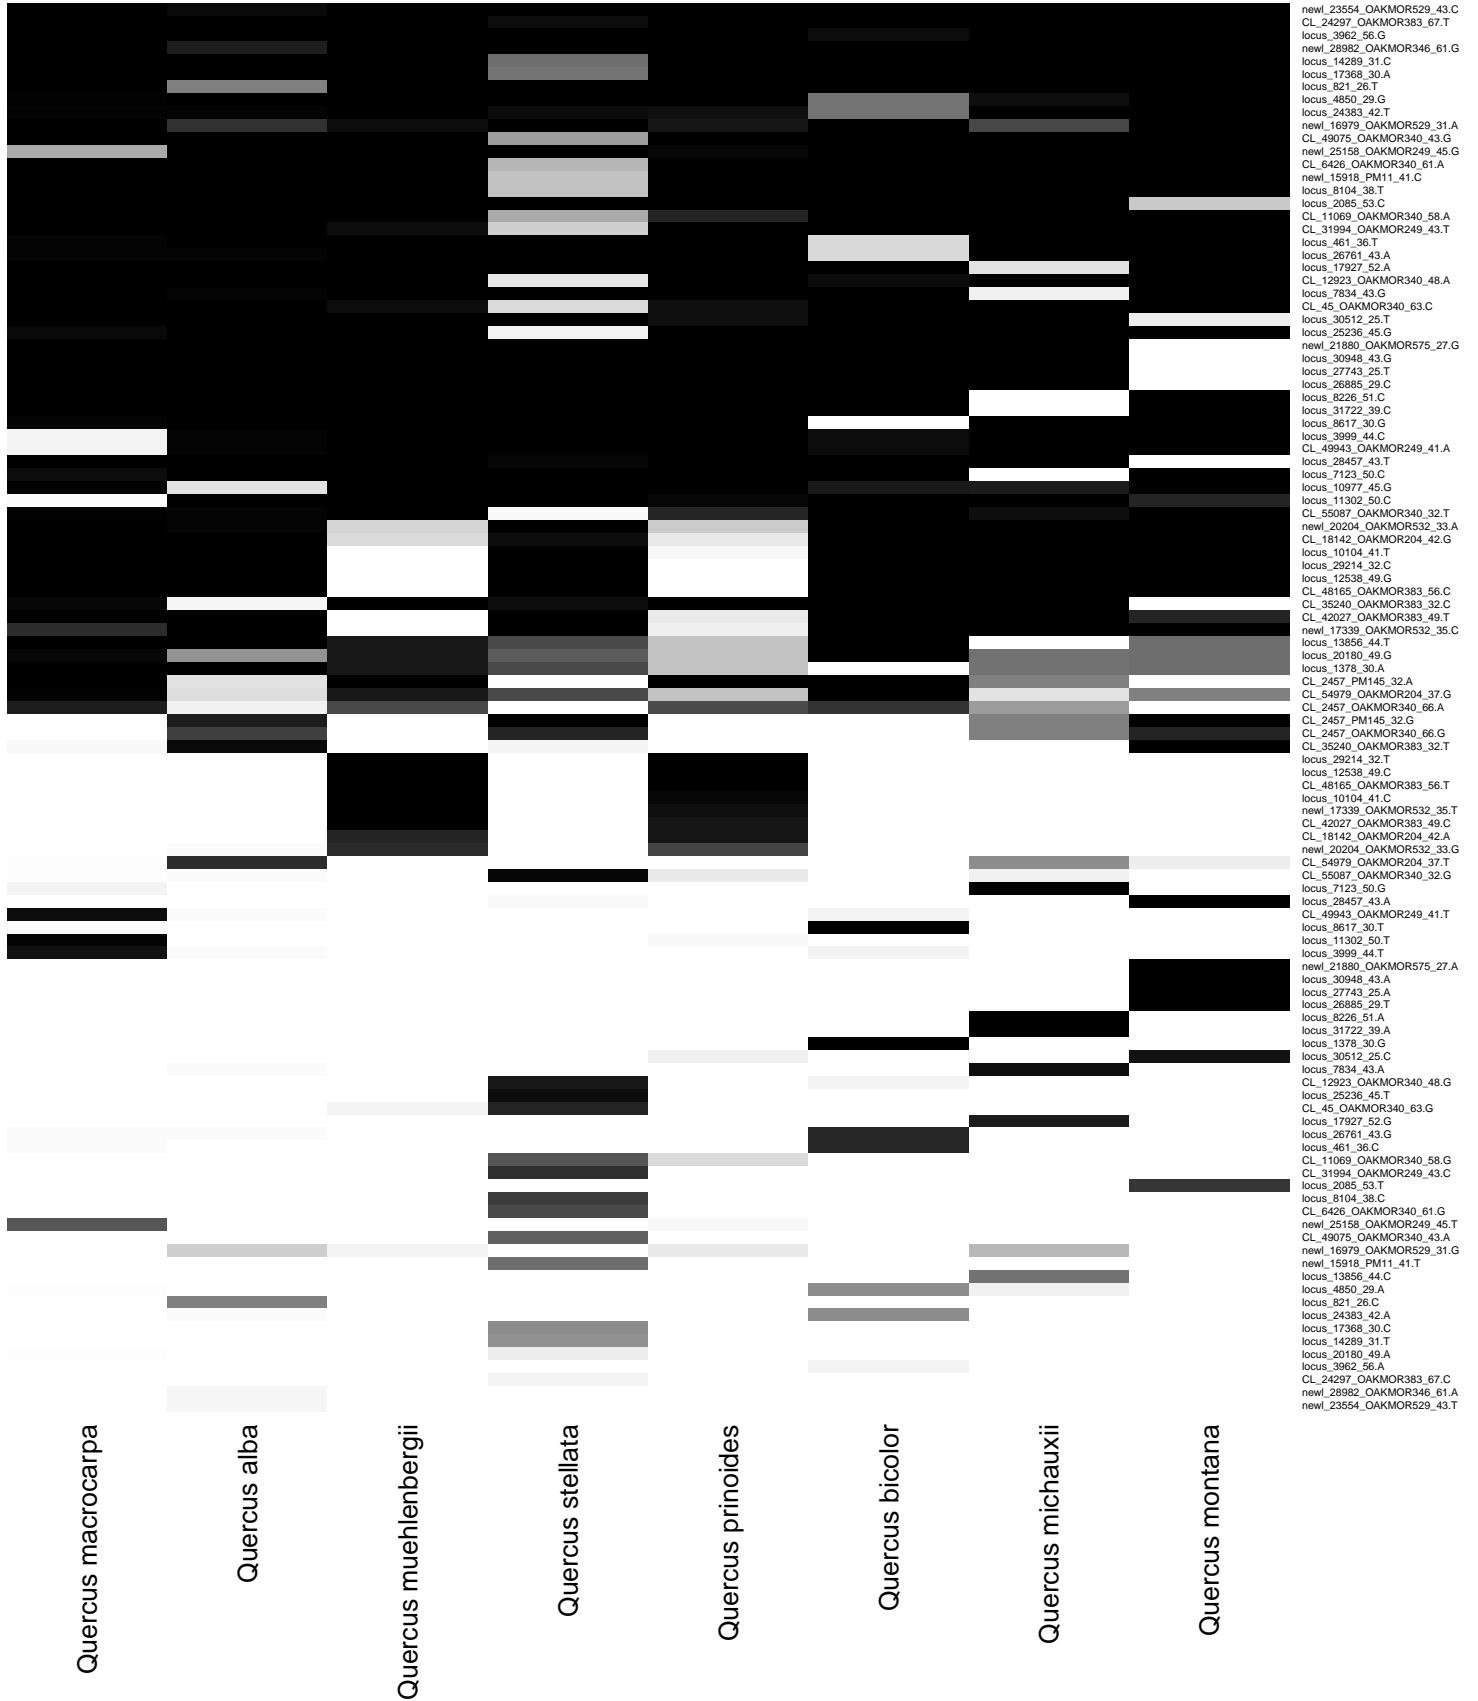

A

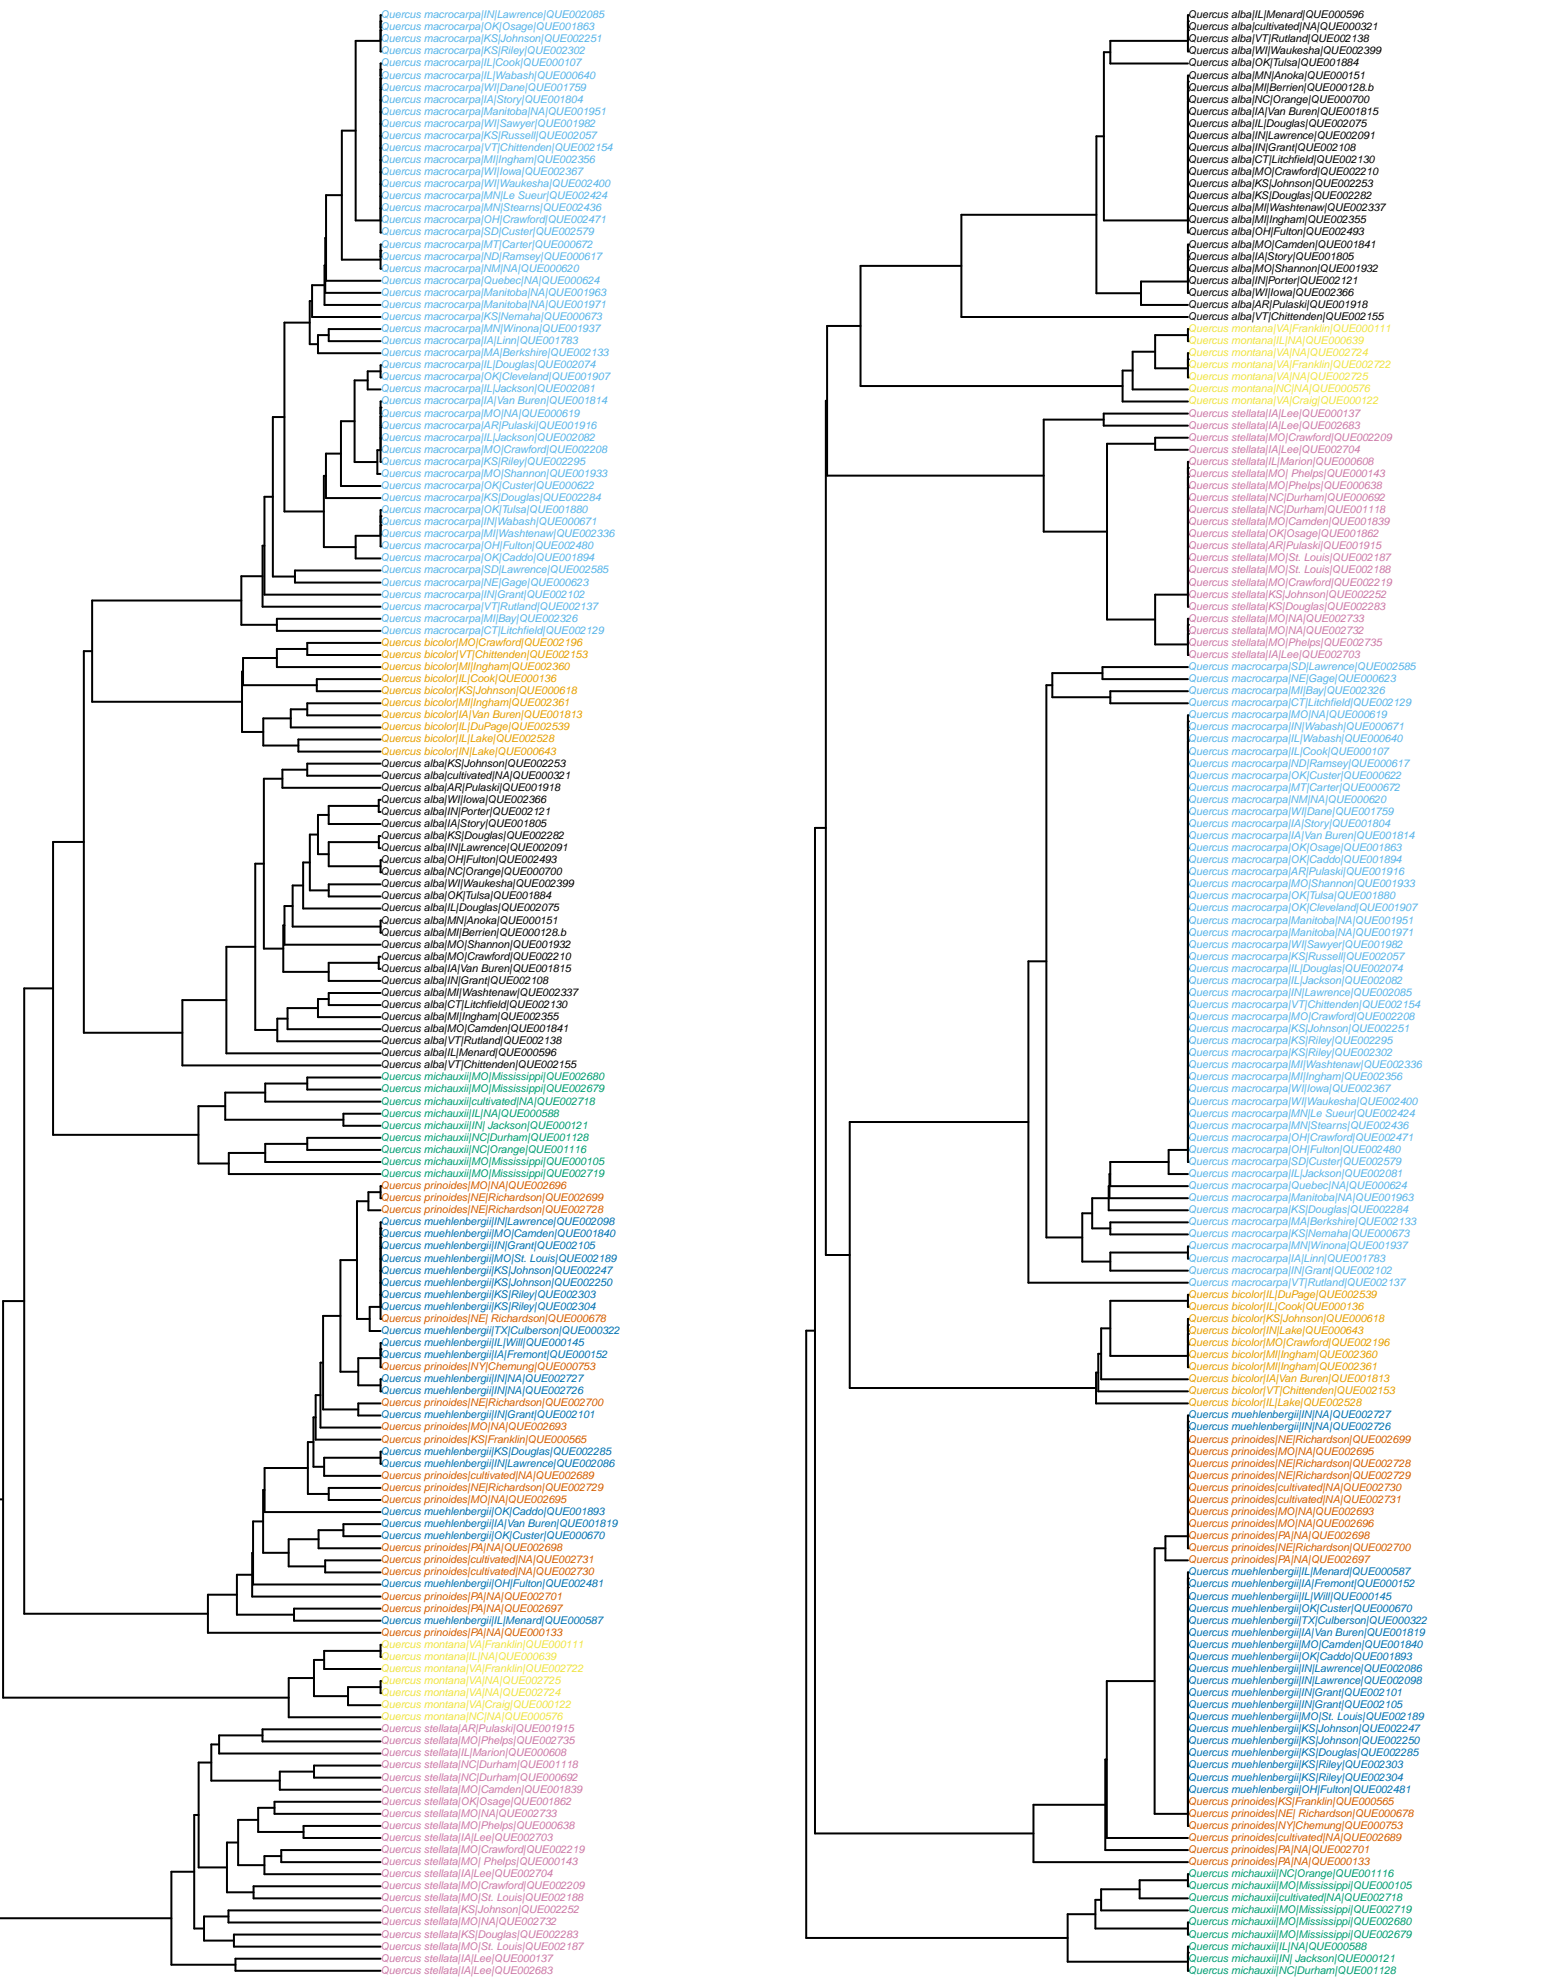

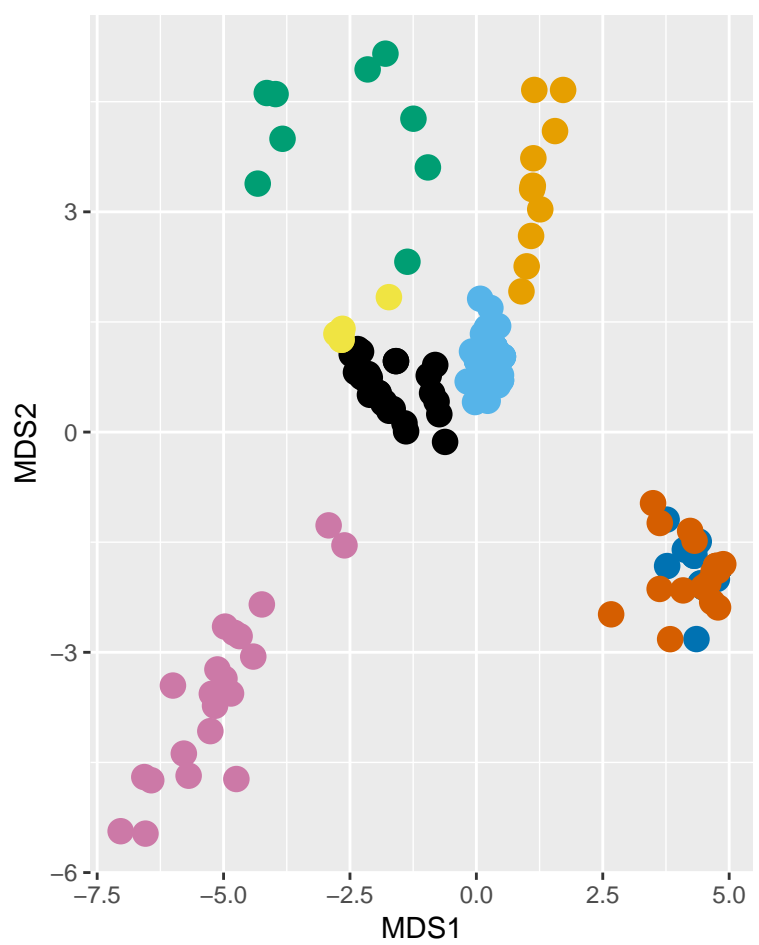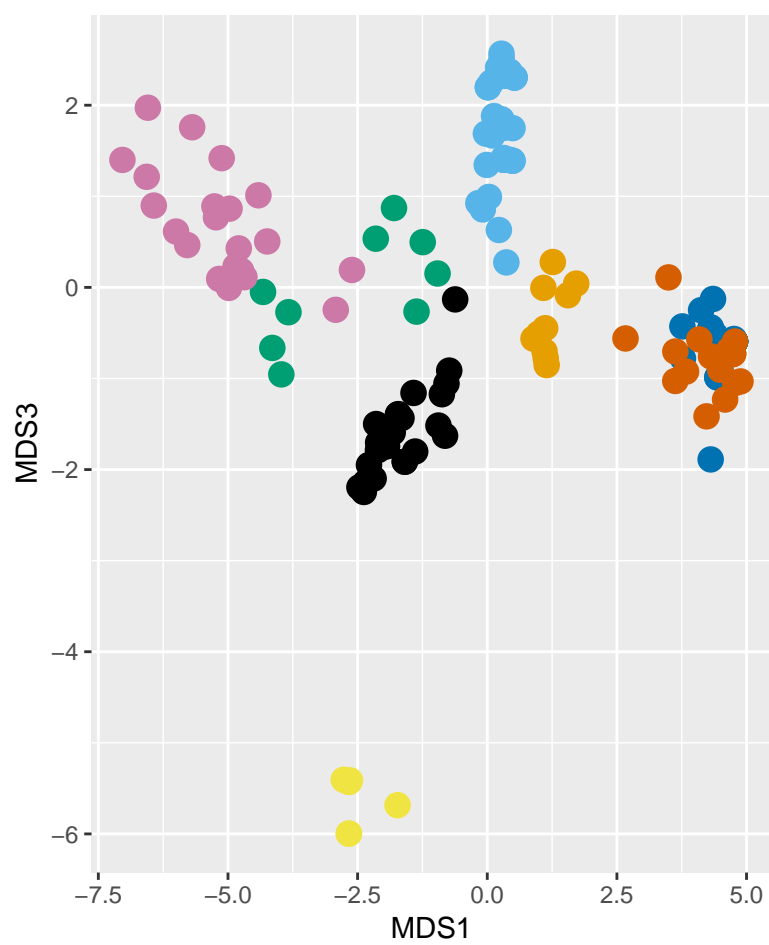

### Species

- *Quercus alba*
- *Quercus bicolor*
- *Quercus macrocarpa*
- *Quercus michauxii*
- *Quercus montana*
- *Quercus muehlenbergii*
- *Quercus prinoides*
- *Quercus stellata*



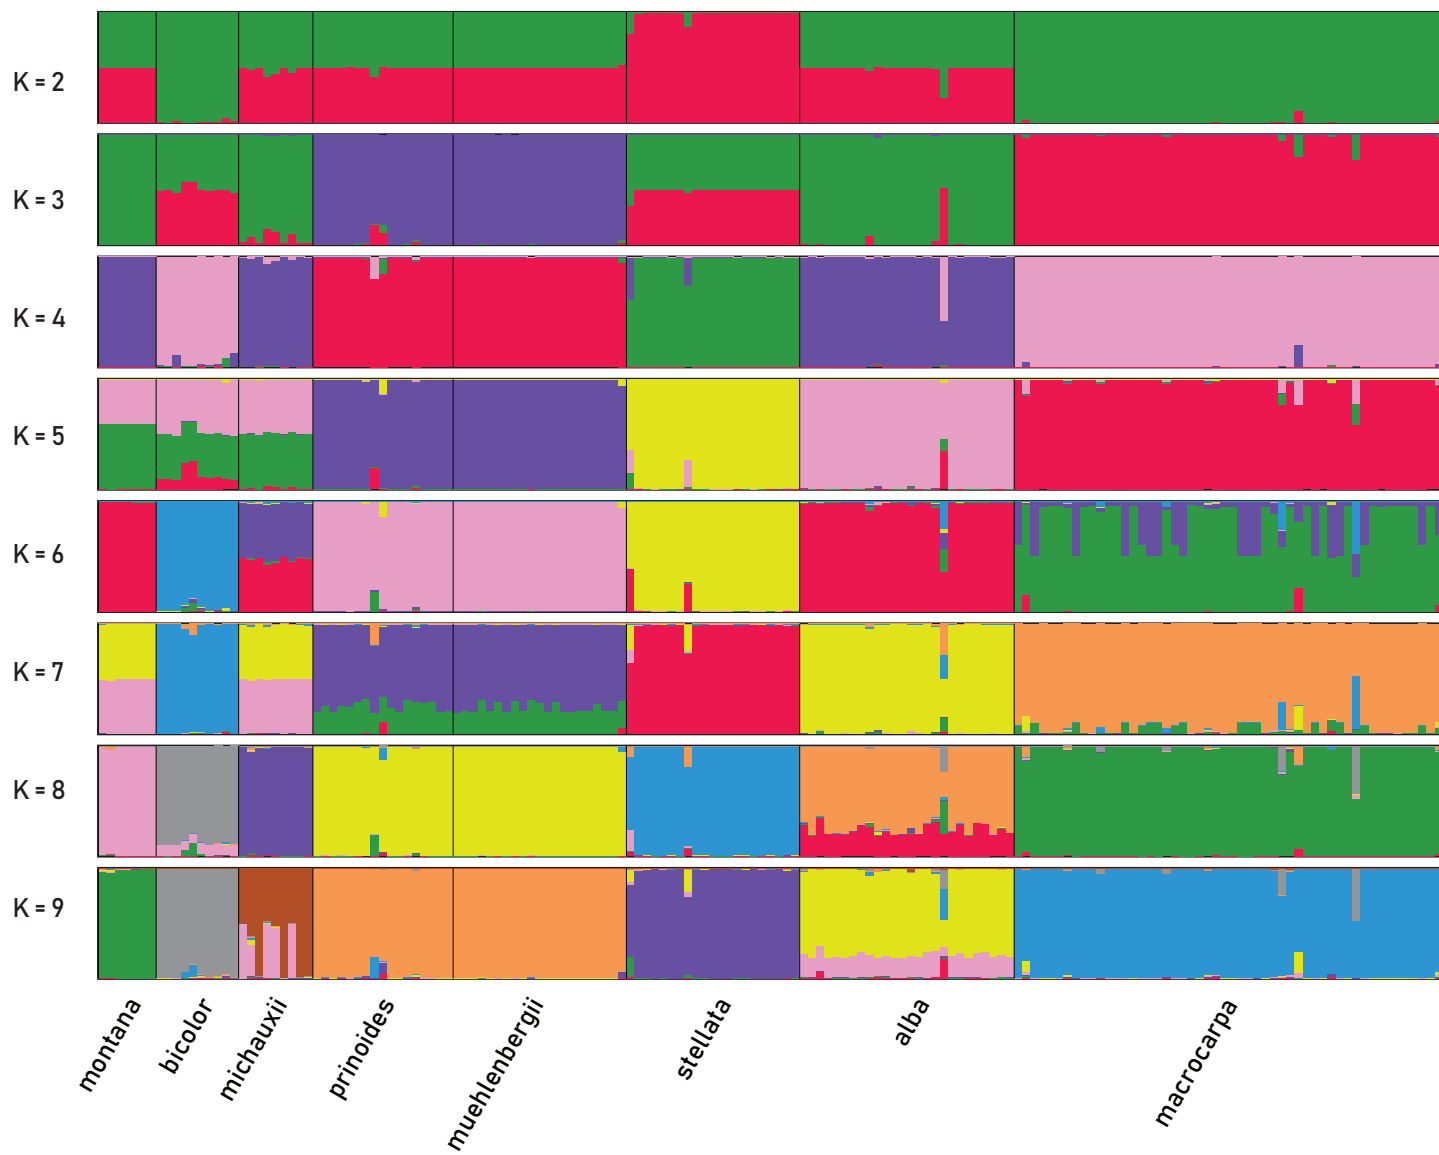

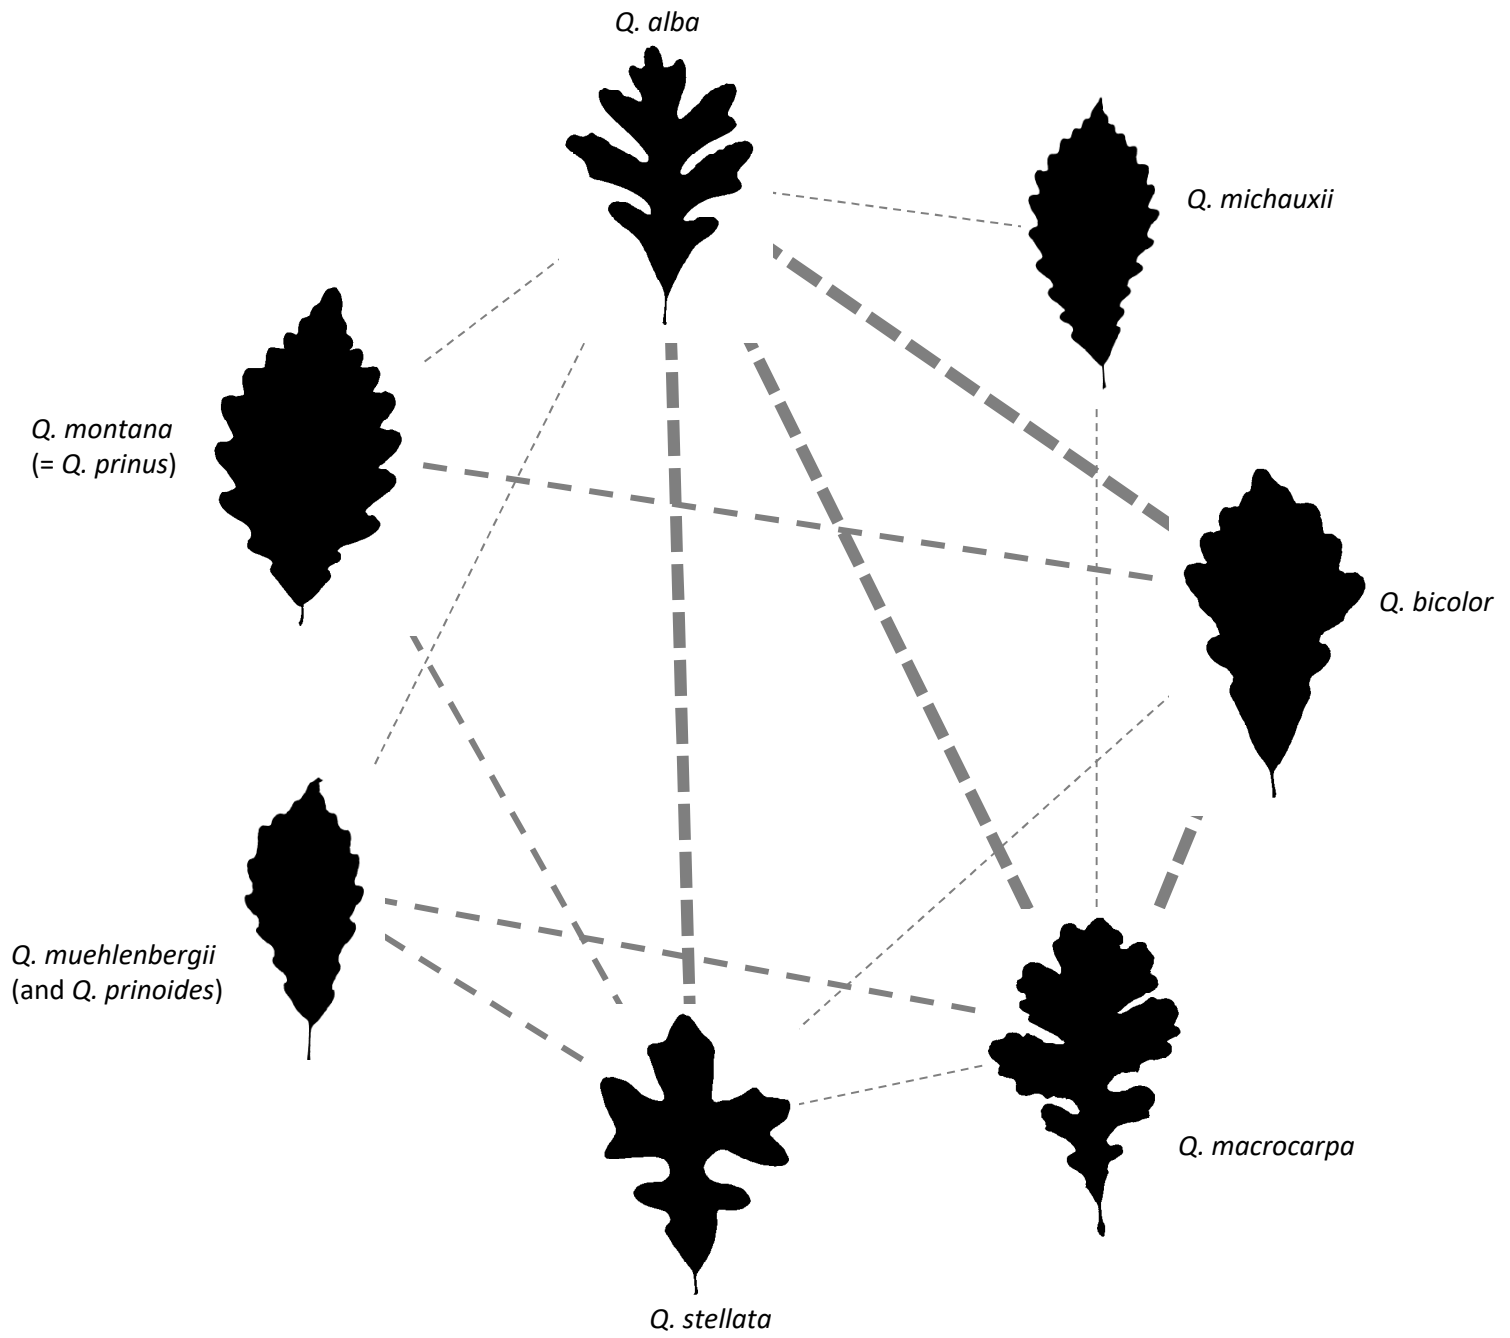

Source: https://www.biorxiv.org/content/10.1101/602573v1.full.pdf
